# Supplementary material
Source: HighWire-hosted journal article supplement (https://erj.ersjournals.com/content/59/4/2100769)

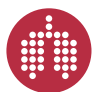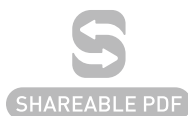

# The effect of immunosuppressants on the prognosis of SARS-CoV-2 infection

Daniel Ward <sup>1,2</sup>, Sanne Gørtz<sup>1</sup>, Martin Thomson Ernst <sup>3</sup>, Nynne Nyboe Andersen <sup>4</sup>, Susanne K. Kjær <sup>5</sup>, Jesper Hallas <sup>6</sup>, Steffen Christensen <sup>7</sup>, Christian Fynbo Christiansen <sup>8</sup>, Simone Bastrup Israelsen <sup>9</sup>, Thomas Benfield <sup>9</sup>, Anton Pottegård <sup>10</sup> and Tine Jess <sup>1,2</sup>

<sup>1</sup>Dept of Epidemiology Research, Statens Serum Institut, Copenhagen, Denmark. <sup>2</sup>Dept of Clinical Medicine, Center for Molecular Prediction of Inflammatory Bowel Disease (PREDICT), Aalborg University, Copenhagen, Denmark. <sup>3</sup>Dept of Public Health, Clinical Pharmacology, Pharmacy and Environmental Medicine, University of Southern Denmark, Odense, Denmark. <sup>4</sup>Dept of Medical Gastroenterology and Hepatology, Rigshospitalet, Copenhagen, Denmark. <sup>5</sup>Unit of Virus, Lifestyle and Genes, Danish Cancer Society Research Center, Copenhagen, Denmark. <sup>6</sup>Research Unit of Clinical Pharmacology, University of Southern Denmark, Odense, Denmark. <sup>7</sup>Dept of Intensive Care, Aarhus University Hospital, Aarhus, Denmark. <sup>8</sup>Dept of Clinical Epidemiology, Aarhus University Hospital, Aarhus, Denmark. <sup>9</sup>Dept of Infectious Diseases, Center of Research and Disruption of Infectious Diseases (CREDID), Copenhagen University Hospital, Amager and Hvidovre Hospital, Hvidovre, Denmark. <sup>10</sup>Dept of Clinical Pharmacology and Pharmacy, University of Southern Denmark, Odense, Denmark.

Corresponding author: Daniel Ward ([djwa@dcm.aau.dk](mailto:djwa@dcm.aau.dk))

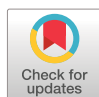

Shareable abstract (@ERSpublications)

**In a nationwide cohort study of SARS-CoV-2 infections in Denmark, pre-morbid exposure to systemic glucocorticoids was associated with an increased risk of hospital admission and death, whereas other immunosuppressants were not** <https://bit.ly/3xRp7ZL>

**Cite this article as:** Ward D, Gørtz S, Thomson Ernst M, *et al.* The effect of immunosuppressants on the prognosis of SARS-CoV-2 infection. *Eur Respir J* 2022; 59: 2100769 [DOI: 10.1183/13993003.00769-2021].

This single-page version can be shared freely online.

Copyright ©The authors 2022.

This version is distributed under the terms of the Creative Commons Attribution Non-Commercial Licence 4.0. For commercial reproduction rights and permissions contact [permissions@ersnet.org](mailto:permissions@ersnet.org)

This article has an editorial commentary: <https://doi.org/10.1183/13993003.02828-2021>

Received: 15 March 2021  
Accepted: 9 Aug 2021

## Abstract

**Background** Immunosuppression may worsen severe acute respiratory syndrome coronavirus 2 (SARS-CoV-2) infection. We conducted a nationwide cohort study of the effect of exposure to immunosuppressants on the prognosis of SARS-CoV-2 infection in Denmark.

**Methods** We identified all SARS-CoV-2 test-positive patients from February 2020 to October 2020 and linked healthcare data from nationwide registers, including prescriptions for the exposure (immunosuppressant drugs). We estimated relative risks of hospital admission, intensive care unit (ICU) admission and death (each studied independently up to 30 days from testing) with a log-linear binomial regression adjusted for confounders using a propensity score-based matching weights model.

**Results** A composite immunosuppressant exposure was associated with a significantly increased risk of death (adjusted relative risk 1.56 (95% CI 1.10–2.22)). The increased risk of death was mainly driven by exposure to systemic glucocorticoids (adjusted relative risk 2.38 (95% CI 1.72–3.30)), which were also associated with an increased risk of hospital admission (adjusted relative risk 1.34 (95% CI 1.10–1.62)), but not of ICU admission (adjusted relative risk 1.76 (95% CI 0.93–3.35)); these risks were greater for high cumulative doses of glucocorticoids than for moderate doses. Exposure to selective immunosuppressants, tumour necrosis factor inhibitors or interleukin inhibitors was not associated with an increased risk of hospitalisation, ICU admission or death, nor was exposure to calcineurin inhibitors, other immunosuppressants, hydroxychloroquine or chloroquine.

**Conclusions** Exposure to glucocorticoids was associated with increased risks of hospital admission and death. Further investigation is needed to determine the optimal management of coronavirus disease 2019 (COVID-19) in patients with pre-morbid glucocorticoid usage, specifically whether these patients require altered doses of glucocorticoids.

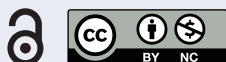

Supplement: inline-supplementary-material-2 [file inline-supplementary-material-2.pdf]
