# Supplementary material
Source: HighWire-hosted journal article supplement (https://erj.ersjournals.com/content/59/4/2100769)
Supplement: inline-supplementary-material-1 [file inline-supplementary-material-1.pdf]

**Appendix**

Appendix to ‘The effect of immunosuppressants on the prognosis of SARS-CoV-2 infection: a nationwide Danish cohort study.’

**Table of Contents**

|                                  |    |
|----------------------------------|----|
| <b>Investigators</b> .....       | 3  |
| <b>Appendix Table A1</b> .....   | 4  |
| <b>Appendix Table A2</b> .....   | 5  |
| <b>Appendix Table A3</b> .....   | 6  |
| <b>Appendix Table A4</b> .....   | 9  |
| <b>Appendix Table A5</b> .....   | 9  |
| <b>Appendix Table A6</b> .....   | 10 |
| <b>Appendix Table A7</b> .....   | 10 |
| <b>Appendix Table A8</b> .....   | 11 |
| <b>Appendix Table A9</b> .....   | 12 |
| <b>Appendix Table A10</b> .....  | 13 |
| <b>Appendix Table A11</b> .....  | 14 |
| <b>Appendix Table A12</b> .....  | 14 |
| <b>Appendix Figure A1</b> .....  | 15 |
| <b>Appendix Table A13</b> .....  | 16 |
| <b>Appendix Table A14</b> .....  | 17 |
| <b>Appendix Table A15</b> .....  | 18 |
| <b>Appendix Table A16</b> .....  | 19 |
| <b>Appendix Table A17</b> .....  | 20 |
| <b>Appendix Table A18</b> .....  | 21 |
| <b>Appendix Table A19</b> .....  | 22 |
| <b>Appendix Table A20</b> .....  | 23 |
| <b>Appendix Table A21</b> .....  | 24 |
| <b>Appendix Methods</b> .....    | 25 |
| <b>INTRODUCTION</b> .....        | 25 |
| <b>RESULTS</b> .....             | 25 |
| <b>PROOF</b> .....               | 25 |
| <b>Appendix Table S1.</b> .....  | 25 |
| <b>Appendix Table S2.</b> .....  | 26 |
| <b>Appendix Figure A2.</b> ..... | 27 |

## Investigators

Daniel Ward (0000-0003-0405-7250), Sanne Gørtz, Martin Thomsen Ernst (0000-0001-9003-3823), Nynne Nyboe Andersen (0000-0003-0874-0356), Susanne K Kjær (0000-0002-8347-1398), Jesper Hallas (0000-0002-8097-8708), Steffen Christensen, Christian Fynbo Christiansen (0000-0002-0727-953X), Simone Bastrup Israelsen, Thomas Benfield (0000-0003-0698-9385), Anton Pottegård (0000-0001-9314-5679), Tine Jess (0000-0002-4391-7332).

Department of Epidemiology Research, Statens Serum Institut, Artillerivej 5, 2300 Copenhagen, Denmark;  
Center for Molecular Prediction of Inflammatory Bowel Disease (PREDICT), Department of Clinical Medicine, Aalborg University, Copenhagen, Denmark.

Daniel Ward  
doctoral student

Department of Epidemiology Research, Statens Serum Institut, Artillerivej 5, 2300 Copenhagen, Denmark

Sanne Gørtz  
statistician

Department of Public Health, Clinical Pharmacology, Pharmacy and Environmental Medicine, University of Southern Denmark, J.B. Winsløvs Vej 19, 5000 Odense, Denmark

Martin Thomsen Ernst  
data manager

Department of Medical Gastroenterology and Hepatology, Rigshospitalet, Inge Lehmanns Vej 5, 2100 Copenhagen, Denmark

Nynne Nyboe Andersen  
Senior registrar

Unit of Virus, Lifestyle and Genes, Danish Cancer Society Research Center, Strandboulevarden 9, 2100 Copenhagen, Denmark

Susanne K Kjær  
professor

Research Unit of Clinical Pharmacology, University of Southern Denmark, J.B. Winsløvs Vej 9, 5000 Odense, Denmark

Jesper Hallas  
professor

Department of Intensive Care, Aarhus University Hospital, Palle Juul-Jensens Boulevard 99, 8200 Aarhus, Denmark

Steffen Christensen  
Associate professor

Department of Clinical Epidemiology, Aarhus University Hospital, Palle Juul-Jensens Boulevard 99, 8200 Aarhus, Denmark

Christian Fynbo Christiansen  
Associate professor

Center of Research & Disruption of Infectious Diseases (CREDID), Department of Infectious Diseases, Copenhagen University Hospital, Amager and Hvidovre Hospital, Kettergård Allé 30, 2650 Hvidovre, Denmark

Simone Elisabeth Bastrup Israelsen  
Doctoral student

Center of Research & Disruption of Infectious Diseases (CREDID), Department of Infectious Diseases, Copenhagen University Hospital, Amager and Hvidovre Hospital, Kettergård Allé 30, 2650 Hvidovre, Denmark

Thomas Benfield  
professor

Department of Clinical Pharmacology and Pharmacy, University of Southern Denmark, J.B. Winsløvs Vej 9, 5000 Odense, Denmark

Anton Pottegård  
Professor

Department of Epidemiology Research, Statens Serum Institut, Artillerivej 5, 2300 Copenhagen, Denmark;  
Center for Molecular Prediction of Inflammatory Bowel Disease (PREDICT), Department of Clinical  
Medicine, Aalborg University, Copenhagen, Denmark.

Tine Jess  
professor

Correspondence to: Daniel Ward

email: djwa@dcm.aau.dk

Telephone: 0045 4278 4188

Address: Center for Molecular Prediction of Inflammatory Bowel Disease (PREDICT),  
Department of Clinical Medicine, Aalborg University, Copenhagen, Denmark.

**Appendix Table A1. Medications studied as exposures and corresponding ATC and procedure codes.**

| Medication                              | ATC code | Procedure code |
|-----------------------------------------|----------|----------------|
| <b>Selective immunosuppressants</b>     |          |                |
| Muromonab-CD3                           | L04AA02  |                |
| Antilymphocyte immunoglobulin (horse)   | L04AA03  |                |
| Antithymocyte immunoglobulin (rabbit)   | L04AA04  | BOHJ12         |
| Mycophenolic acid                       | L04AA06  | BOHJ22         |
| Sirolimus                               | L04AA10  | BOHJ23         |
| Leflunomide                             | L04AA13  |                |
| Everolimus                              | L04AA18  | BOHJ24         |
| Natalizumab                             | L04AA23  | BOHJ26         |
| Abatacept                               | L04AA24  | BOHJ18C1       |
| Eculizumab                              | L04AA25  | BWHB84         |
| Belimumab                               | L04AA26  | BOHJ19H6       |
| Fingolimod                              | L04AA27  | BOHJ27         |
| Belatacept                              | L04AA28  |                |
| Tofacitinib                             | L04AA29  | BOHJ28D        |
| Teriflunomide                           | L04AA31  | BOHJ28A        |
| Aprelimast                              | L04AA32  |                |
| Vedolizumab                             | L04AA33  | BOHJ19H4       |
| Alemtuzumab                             | L04AA34  | BOHJ16A        |
| Ocrelizumab                             | L04AA36  |                |
| Baricitinib                             | L04AA37  |                |
| Ozanimod                                | L04AA38  |                |
| Emapalumab                              | L04AA39  |                |
| Cladribine                              | L04AA40  | BWHA178        |
| Imlifidase                              | L04AA41  |                |
| Siponimod                               | L04AA42  | BWHB87         |
| Ravulizumab                             | L04AA43  |                |
| Upadacitinib                            | L04AA44  |                |
| <b>Tumor necrosis factor inhibitors</b> |          |                |
| Etanercept                              | L04AB01  | BOHJ18A2       |
| Infliximab                              | L04AB02  | BOHJ18A1       |
| Adalimumab                              | L04AB04  | BOHJ18A3       |
| Certolizumab pegol                      | L04AB05  | BOHJ18A5       |
| Golimumab                               | L04AB06  | BOHJ18A4       |
| <b>Interleukin inhibitors</b>           |          |                |
| Basiliximab                             | L04AC02  |                |
| Anakinra                                | L04AC03  | BOHJ18B1       |
| Ustekinumab                             | L04AC05  | BOHJ18B3       |
| Tocilizumab                             | L04AC07  | BOHJ18B2       |
| Canakinumab                             | L04AC08  | BOHJ18B4       |
| Secukinumab                             | L04AC10  | BOHJ18B5       |
| Siltuximab                              | L04AC11  |                |
| Brodalumab                              | L04AC12  | BOHJ18B6       |
| Ixekizumab                              | L04AC13  |                |
| Sarilumab                               | L04AC14  | BOHJ18B9       |
| Guselkumab                              | L04AC16  |                |
| Tildrakizumab                           | L04AC17  | BOHJ18B7       |
| Risankizumab                            | L04AC18  | BOHJ19N1       |
| <b>Calcineurin inhibitors</b>           |          |                |
| Ciclosporin                             | L04AD01  | BOHJ20         |
| Tacrolimus                              | L04AD02  | BOHJ21         |
| <b>Other immunosuppressants</b>         |          |                |
| Azathioprine                            | L04AX01  | BWHB83         |
| Thalidomide                             | L04AX02  | BWHB81         |
| Methotrexate                            | L04AX03  | BWHA115        |

|                                 |         |         |
|---------------------------------|---------|---------|
| Lenalidomide                    | L04AX04 | BWHB82  |
| Pirfenidone                     | L04AX05 | BWHB85  |
| Pomalidomide                    | L04AX06 | BWHB86  |
| Dimethyl fumarate               | L04AX07 | BOHJ28B |
| Darvadstrocel                   | L04AX08 |         |
| <b>Systemic glucocorticoids</b> | H02AB   |         |
| <b>Aminoquinolines</b>          |         |         |
| Chloroquine                     | P01BA01 |         |
| Hydroxychloroquine              | P01BA02 |         |
| <b>Rituximab</b>                | L01XC02 |         |

Abbreviations: ATC; anatomical therapeutic chemicals.

#### Appendix Table A2. Minimum daily dose of glucocorticoids in exposed persons

| Compound           | Equivalent dose |
|--------------------|-----------------|
| Cortisone          | 38 mg           |
| Hydrocortisone     | 30 mg           |
| Prednisone         | 7.5 mg          |
| Prednisolone       | 7.5 mg          |
| Triamcinolone      | 6 mg            |
| Methylprednisolone | 6 mg            |
| Betamethasone      | 1.2 mg          |
| Dexamethasone      | 1.2 mg          |

Appendix Table A3. Covariates for propensity scores.

| Variable                                                                                                                                                                                                                                                                                                                                    | Categories/<br>ATC/ICD codes                                                             | Time window prior to prior<br>to cohort entry |
|---------------------------------------------------------------------------------------------------------------------------------------------------------------------------------------------------------------------------------------------------------------------------------------------------------------------------------------------|------------------------------------------------------------------------------------------|-----------------------------------------------|
| <i>Demographics</i>                                                                                                                                                                                                                                                                                                                         |                                                                                          |                                               |
| Date of birth                                                                                                                                                                                                                                                                                                                               | Restricted cubic spline with 3 knots                                                     |                                               |
| Sex                                                                                                                                                                                                                                                                                                                                         | Male/female                                                                              |                                               |
| <i>Healthcare utilisation</i>                                                                                                                                                                                                                                                                                                               |                                                                                          |                                               |
| Hospital admissions and outpatient contacts                                                                                                                                                                                                                                                                                                 | 0, 1-2, 3-5, 6+                                                                          | 1 year before cohort entry date               |
| Date of SARS-COV-2 testing                                                                                                                                                                                                                                                                                                                  | Restricted cubic spline with 3 knots                                                     |                                               |
| <i>Co-medications</i>                                                                                                                                                                                                                                                                                                                       |                                                                                          |                                               |
| Antianaemic drugs                                                                                                                                                                                                                                                                                                                           | B03                                                                                      | Since 1994                                    |
| Cardiovascular drugs                                                                                                                                                                                                                                                                                                                        | C01-10                                                                                   | Since 1994                                    |
| Antimicrobials                                                                                                                                                                                                                                                                                                                              | J01-06                                                                                   | Since 1994                                    |
| Anticoagulants                                                                                                                                                                                                                                                                                                                              | B01AA                                                                                    | Since 1994                                    |
| Drugs used in diabetes                                                                                                                                                                                                                                                                                                                      | A10                                                                                      | Since 1994                                    |
| Drugs for obstructive airway diseases                                                                                                                                                                                                                                                                                                       | R03                                                                                      | Since 1994                                    |
| <i>Conditions indicating immunosuppressive therapy</i>                                                                                                                                                                                                                                                                                      |                                                                                          |                                               |
| <b>Neoplasms, blood and blood-forming organs</b><br>Paroxysmal nocturnal haemoglobinuria<br>Sarcoidosis<br>Osteomyelofibrosis (Castleman's disease)<br>Multiple myeloma                                                                                                                                                                     | DD595<br>DD86<br>DD474<br>DC900                                                          | All since 1994                                |
| <b>Neurological and musculoskeletal disease</b><br>Seronegative arthritis<br>Seropositive arthritis<br>Psoriatic arthropathy<br>Juvenile idiopathic arthritis<br>Generalized connective tissue diseases<br>Spondylopathies<br>Diseases of the muscles<br>Soft-tissue rheumatism<br>Neuromuscular and muscular disease<br>Multiple sclerosis | DM05<br>DM06<br>DM07<br>DM08<br>DM30-36<br>DM45-49<br>DM60-63<br>DM70-79 DG70-73<br>DG35 | All since 1994                                |
| <b>Solid organ transplantation</b><br>Kidney transplanted<br>Heart transplanted<br>Lung transplanted<br>Heart and lung transplanted<br>Liver transplanted                                                                                                                                                                                   | DZ940<br>DZ941<br>DZ942<br>DZ943<br>DZ944                                                | All since 1994                                |
| <b>Pulmonary disease</b><br>Chronic disease of the lower airways<br>Other interstitial lung disease<br>Diseases with pus and necrosis in the lower airway<br>Interstitial lung emphysema<br>compensatory emphysema                                                                                                                          | DJ4<br>DJ84<br>DJ85<br>DJ982<br>DJ983                                                    | All since 1994                                |
| <b>Liver disease</b>                                                                                                                                                                                                                                                                                                                        | DK7                                                                                      | All since 1994                                |
| <b>Kidney disease</b><br>Glomerular disease<br>Tubulointerstitial kidney disease and kidney insufficiency                                                                                                                                                                                                                                   | DN0<br>DN1                                                                               | All since 1994                                |
| <b>Diseases of the gastrointestinal tract</b><br>Crohn's disease<br>Ulcerative colitis<br>Cholangitis                                                                                                                                                                                                                                       | DK50<br>DK51<br><br>DK830                                                                | All since 1994                                |
| <b>Skin disease</b><br>Hidradenitis suppurativa<br>Psoriasis<br>Bullous skin disease<br>Dermatitis and eczema<br>Alopecia areata<br>Vitiligo<br>Granulomatous disease in the skin and subcutaneous tissue<br>Lupus<br>Other localised connective tissue disease<br>Vasculitis limited to the skin                                           | DL73.2<br>DL40<br>DL10-14<br>DL20-30<br>DL63<br>DL80<br>DL92<br>DL93<br>DL94<br>DL95     | All since 1994                                |
| <i>Other comorbidities</i>                                                                                                                                                                                                                                                                                                                  |                                                                                          |                                               |
| <b>Cardiovascular disease</b><br>Ischaemic heart disease<br>Diseases of the endocardium, pericardium and valves                                                                                                                                                                                                                             | DI2<br>DI3                                                                               | All since 1994                                |

|                                                                                                                                                                                                                                                                                                                                                                                                                                                                                                                                                                                                                                                                                                                                                                                                                                                                                                                                                                                                                                                                                                                                                                                                                                                                                                                                                                                                                                                                                                                                                                                                                                                                                                                                                                                                                                                                                                                                                             |                                                                                                                                                                                                                                                                                                                                            |                            |
|-------------------------------------------------------------------------------------------------------------------------------------------------------------------------------------------------------------------------------------------------------------------------------------------------------------------------------------------------------------------------------------------------------------------------------------------------------------------------------------------------------------------------------------------------------------------------------------------------------------------------------------------------------------------------------------------------------------------------------------------------------------------------------------------------------------------------------------------------------------------------------------------------------------------------------------------------------------------------------------------------------------------------------------------------------------------------------------------------------------------------------------------------------------------------------------------------------------------------------------------------------------------------------------------------------------------------------------------------------------------------------------------------------------------------------------------------------------------------------------------------------------------------------------------------------------------------------------------------------------------------------------------------------------------------------------------------------------------------------------------------------------------------------------------------------------------------------------------------------------------------------------------------------------------------------------------------------------|--------------------------------------------------------------------------------------------------------------------------------------------------------------------------------------------------------------------------------------------------------------------------------------------------------------------------------------------|----------------------------|
| Diseases of the endocardium, conductive tissue and cardiac arrest<br>Vascular disease in the brain<br>Heart failure<br>Disease the arteries, arterioles and capillaries<br>Oesophageal varices<br>Abdominal varices<br>Hypertensive liver disease<br>Vascular disease in the bowel                                                                                                                                                                                                                                                                                                                                                                                                                                                                                                                                                                                                                                                                                                                                                                                                                                                                                                                                                                                                                                                                                                                                                                                                                                                                                                                                                                                                                                                                                                                                                                                                                                                                          | DI4<br>DI5<br>DI6<br>DI7<br>DI85<br>DI864<br>DI12<br>DK550                                                                                                                                                                                                                                                                                 |                            |
| <i>Indicators of severity of the underlying disease</i>                                                                                                                                                                                                                                                                                                                                                                                                                                                                                                                                                                                                                                                                                                                                                                                                                                                                                                                                                                                                                                                                                                                                                                                                                                                                                                                                                                                                                                                                                                                                                                                                                                                                                                                                                                                                                                                                                                     |                                                                                                                                                                                                                                                                                                                                            |                            |
| <b>Medications for immune-mediated inflammatory diseases</b><br>Intestinal corticosteroids<br>Aminosalicylic acid and similar agents<br>Topical corticosteroids<br>Antipsoriatic medications<br>Anti-rheumatic therapies, non-steroidals, and combination medications                                                                                                                                                                                                                                                                                                                                                                                                                                                                                                                                                                                                                                                                                                                                                                                                                                                                                                                                                                                                                                                                                                                                                                                                                                                                                                                                                                                                                                                                                                                                                                                                                                                                                       | A07EA<br>A07EC<br>D07<br>D05<br>M01                                                                                                                                                                                                                                                                                                        | 1 year before cohort entry |
| <b>Gastrointestinal pathologies</b><br>Gingivitis and periodontal disease<br>Inflammation of the oral mucosa and related<br>Stomach and duodenal ulcers<br>Fissure and rifts in and around the anus<br>Abscess in and around the anus<br>Other diseases of the rectum and anus<br>Other bowel disease                                                                                                                                                                                                                                                                                                                                                                                                                                                                                                                                                                                                                                                                                                                                                                                                                                                                                                                                                                                                                                                                                                                                                                                                                                                                                                                                                                                                                                                                                                                                                                                                                                                       | DK05<br>DK12<br>DK25-27<br>DK60<br>DK61<br>DK62<br>DK63                                                                                                                                                                                                                                                                                    | All since 1994             |
| <b>Procedures on the skin, GI tract, or joints</b><br>Ultraviolet therapy: UV-A with psoralen/broad-spectrum UVB /<br>narrow-spectrum UVB<br>Operations on the skin or subcutaneous tissue<br>Drainage of pelvic abscess to the rectum<br>Lysis of adhesions in the abdominal cavity<br>Operations of the small intestine and colon<br>Operations on the rectum<br>Operations on the anus and perianal tissue<br>Closure of intestinovaginal fistula with graft or flap<br>Closure of vesicointestinal fistula<br>Endoscopy of the gastro-intestinal tract<br>Shoulder and upper arm<br>Primary insertion of joint prosthesis<br>Secondary insertion of joint prosthesis<br>Operations on the joint capsule and ligaments<br>Operations of the synovia and joint surface<br>Joint resections, arthroplasties, and arthrodesis<br>Excision of bursa<br>Elbow and lower arm<br>Primary insertion of joint prosthesis<br>Secondary insertion of joint prosthesis<br>Operations on the joint capsule and ligaments<br>Operations of the synovia and joint surface<br>Joint resections, arthroplasties, and arthrodesis<br>Excision of bursa<br>Wrist and hand<br>Primary insertion of joint prosthesis<br>Secondary insertion of joint prosthesis<br>Operations on the joint capsule and ligaments<br>Operations of the synovia and joint surface<br>Joint resections, arthroplasties, and arthrodesis<br>Operations on the fascia, tendon sheaths, ganglia and bursae<br>Hip and thigh<br>Primary insertion of joint prosthesis<br>Secondary insertion of joint prosthesis<br>Operations on the joint capsule and ligaments<br>Operations of the synovia and joint surface<br>Joint resections, arthroplasties, and arthrodesis<br>Excision of bursa<br>Knee and lower leg<br>Primary insertion of joint prosthesis<br>Secondary insertion of joint prosthesis<br>Operations on the joint capsule and ligaments<br>Operations of the synovia and joint surface | BNGA1-3<br><br>KQ<br>KJAJ<br>KJAP<br>KJF<br>KJG<br>KJH<br>KLEE30<br>KKCH30<br>KUJ<br><br>KNBB<br>KNBC<br>KNBE<br>KNBF<br>KNBG<br>KBM79<br><br>KNCB<br>KNCC<br>KNCE<br>KNCF<br>KNCG<br>KNCM79<br><br>KNDB<br>KNDC<br>KNDE<br>KNDF<br>KNDG<br>KNDM<br><br>KNFB<br>KNFC<br>KNFE<br>KNFF<br>KNFG<br>KNFM79<br><br>KNGB<br>KNGC<br>KNGE<br>KNGF | 1 year before cohort entry |

|                                                              |        |  |
|--------------------------------------------------------------|--------|--|
| Joint resections, arthroplasties, and arthrodesis            | KNGG   |  |
| Excision of bursae                                           | KNGM79 |  |
| <b>Ankle and foot</b>                                        |        |  |
| Primary insertion of joint prosthesis                        | KNHB   |  |
| Secondary insertion of joint prosthesis                      | KNHC   |  |
| Operations on the joint capsule and ligaments                | KNHE   |  |
| Operations of the synovia and joint surface                  | KNHF   |  |
| Joint resections, arthroplasties, and arthrodesis            | KNHG   |  |
| Operations on the fascia, tendon sheaths, ganglia and bursae | KNHM   |  |
| Therapeutic steroid injection in the joints and soft tissues | BLHN0  |  |

Abbreviations: ATC; anatomical therapeutic chemicals, ICD: international classifications of diseases. Each cell with a heading in bold represents one variable, comprising the diseases or medications listed below, with corresponding ICD/ATC codes.



**Appendix Table A4. Relative risk of severe outcomes of SARS-CoV-2 infection for patients exposed to immunosuppressants compared to unexposed patients, with crude, inverse probability of treatment weighting (IPTW) and matching weights models, with further adjustment for antianaemic drugs.**

| Outcome                 | Events/ Exposed | Risk % (95% CI)     | Events/ Unexposed | Risk % (95% CI)     | Risk difference % (95% CI) | Relative risk (95% CI) | Relative risk adjusted for antianaemics (95% CI) |
|-------------------------|-----------------|---------------------|-------------------|---------------------|----------------------------|------------------------|--------------------------------------------------|
| <i>Crude</i>            |                 |                     |                   |                     |                            |                        |                                                  |
| Death                   | 57/527          | 10.8 (8.2 to 13.5)  | 658/36200         | 1.8 (1.7 to 2.0)    | 9.0 (6.3-11.7)             | 5.95 (4.60-7.69)       | 2.46 (1.83-3.30)                                 |
| ICU admission           | 25/527          | 4.7 (2.9 to 6.6)    | 400/36200         | 1.1 (1.0 to 1.2)    | 3.6 (1.8-5.5)              | 4.29 (2.89-6.37)       | 3.00 (1.91-4.72)                                 |
| Admission               | 165/527         | 31.3 (27.3 to 35.3) | 3373/36200        | 9.3 (9.0 to 9.6)    | 22.0 (18.0-26.0)           | 3.36 (2.95-3.83)       | 1.93 (1.67-2.23)                                 |
| <i>IPTW</i>             |                 |                     |                   |                     |                            |                        |                                                  |
| Death                   | 29/273          | 10.7 (4.2 to 17.2)  | 606/22570         | 2.7 (2.5 to 2.9)    | 8.0 (1.5-14.5)             | 3.99 (2.17-7.35)       | 1.98 (1.06-3.68)                                 |
| ICU admission           | 4/273           | 1.5 (0.2 to 2.8)    | 362/22570         | 1.6 (1.4 to 1.8)    | -0.1 (-1.4-1.2)            | 0.93 (0.40-2.18)       | 0.73 (0.30-1.74)                                 |
| Admission               | 60/273          | 22.0 (11.5 to 32.5) | 2981/22570        | 13.2 (12.8 to 13.7) | 8.8 (-1.7-19.3)            | 1.67 (1.03-2.69)       | 1.11 (0.69-1.80)                                 |
| <i>Matching weights</i> |                 |                     |                   |                     |                            |                        |                                                  |
| Death                   | 32/346          | 9.2 (6.2 to 12.3)   | 20/339            | 5.9 (5.2 to 6.7)    | 3.3 (0.2-6.5)              | 1.56 (1.10-2.22)       | 1.71 (1.11-2.65)                                 |
| ICU admission           | 13/346          | 3.8 (1.8 to 5.8)    | 11/339            | 3.2 (2.7 to 3.8)    | 0.5 (-1.6-2.6)             | 1.16 (0.66-2.03)       | 1.40 (0.74-2.66)                                 |
| Admission               | 100/346         | 28.9 (24.1 to 33.7) | 87/339            | 25.5 (24.2 to 26.8) | 3.4 (-1.6-8.3)             | 1.13 (0.95-1.35)       | 1.25 (1.01-1.55)                                 |

Abbreviations: ICU; intensive care unit. Numbers of exposed and unexposed in the propensity score weighted dataset are weighted subjects and do not refer to individual subjects.

**Appendix Table A5. Relative risk of severe outcomes of SARS-CoV-2 infection for patients exposed to selective immunosuppressants, TNF inhibitors, or interleukin inhibitors compared to unexposed patients, with crude, inverse probability of treatment weighting (IPTW) and matching weights models, with further adjustment for antianaemic drugs.**

| Outcome                 | Events/ Exposed | Risk % (95%CI)       | Events/ Unexposed | Risk % (95% CI)     | Risk difference % (95% CI) | Relative risk (95% CI) | Relative risk adjusted for antianaemics (95% CI) |
|-------------------------|-----------------|----------------------|-------------------|---------------------|----------------------------|------------------------|--------------------------------------------------|
| <i>Crude</i>            |                 |                      |                   |                     |                            |                        |                                                  |
| Death                   | 5/192           | 2.6 (0.3 to 4.9)     | 658/36200         | 1.8 (1.7 to 2.0)    | 0.8 (-1.5 to 3.0)          | 1.43 (0.60 to 3.41)    | 0.58 (0.24 to 1.39)                              |
| ICU admission           | 6/192           | 3.1 (0.7 to 5.6)     | 400/36200         | 1.1 (1.0 to 1.2)    | 2.0 (-0.4 to 4.5)          | 2.83 (1.28 to 6.25)    | 1.88 (0.83 to 4.27)                              |
| Admission               | 33/192          | 17.2 (11.8 to 22.5)  | 3373/36200        | 9.3 (9.0 to 9.6)    | 7.9 (2.5 to 13.2)          | 1.84 (1.35 to 2.52)    | 1.07 (0.79 to 1.47)                              |
| <i>IPTW</i>             |                 |                      |                   |                     |                            |                        |                                                  |
| Death                   | 0/46            | 0.7 ( to 0.2 to 1.6) | 280/8468          | 3.3 (2.9 to 3.7)    | -2.6 (-3.6 to -1.6)        | 0.22 (0.06 to 0.76)    | 0.15 (0.04 to 0.50)                              |
| ICU admission           | 0/46            | 0.4 ( to 0.2 to 1.1) | 183/8468          | 2.2 (1.9 to 2.5)    | -1.7 (-2.4 to -1.0)        | 0.20 (0.05 to 0.88)    | 0.17 (0.04 to 0.74)                              |
| Hospital admission      | 13/46           | 27.6 (0.9 to 54.2)   | 1479/8468         | 17.5 (16.7 to 18.3) | 10.1 (-16.4 to 36.6)       | 1.58 (0.60 to 4.14)    | 1.23 (0.49 to 3.08)                              |
| <i>Matching weights</i> |                 |                      |                   |                     |                            |                        |                                                  |
| Death                   | -               | -                    | -                 | -                   | -                          | 1.17 (0.38 to 3.62)    | 0.83 (0.22 to 3.10)                              |
| ICU admission           | -               | -                    | -                 | -                   | -                          | 0.92 (0.23 to 3.71)    | 1.32 (0.25 to 6.93)                              |
| Hospital admission      | 14/87           | 16.1 (8.3 to 23.9)   | 18/91             | 19.5 (18.0 to 21.0) | -3.4 (-11.3 to 4.5)        | 0.83 (0.51 to 1.34)    | 0.76 (0.43 to 1.34)                              |

Abbreviations: ICU; intensive care unit. Numbers of exposed and unexposed in the propensity score weighted dataset are weighted subjects and do not refer to individual subjects.

**Appendix Table A6. Relative risk of severe outcomes of SARS-CoV-2 infection for patients exposed to calcineurin inhibitors, other immunosuppressants, hydroxychloroquine or chloroquine compared to unexposed patients, with crude, inverse probability of treatment weighting (IPTW) and matching weights models, with further adjustment for antianaemic drugs.**

| Outcome                 | Events/ Exposed | Risk % (95%CI)        | Events/ Unexposed | Risk % (95% CI)     | Risk difference % (95% CI) | Relative risk (95% CI) | Relative risk adjusted for antianaemics (95% CI) |
|-------------------------|-----------------|-----------------------|-------------------|---------------------|----------------------------|------------------------|--------------------------------------------------|
| <i>Crude</i>            |                 |                       |                   |                     |                            |                        |                                                  |
| Death                   | 17/268          | 6.3 (3.4 to 9.3)      | 658/36200         | 1.8 (1.7 to 2.0)    | 4.5 (1.6 to 7.4)           | 3.49 (2.19 to 5.56)    | 1.15 (0.71 to 1.86)                              |
| ICU admission           | 16/268          | 6.0 (3.1 to 8.8)      | 400/36200         | 1.1 (1.0 to 1.2)    | 4.9 (2.0 to 7.7)           | 5.40 (3.33 to 8.78)    | 3.32 (1.91 to 5.77)                              |
| Admission               | 77/268          | 28.7 (23.3 to 34.2)   | 3373/36200        | 9.3 (9.0 to 9.6)    | 19.4 (14.0-24.8)           | 3.08 (2.55 to 3.73)    | 1.57 (1.29 to 1.91)                              |
| <i>IPTW</i>             |                 |                       |                   |                     |                            |                        |                                                  |
| Death                   | 8/161           | 4.9 ( to 2.0 to 11.9) | 599/23922         | 2.5 (2.3 to 2.7)    | 2.4 (-4.5 to 9.3)          | 1.96 (0.48 to 8.06)    | 0.86 (0.22 to 3.45)                              |
| ICU admission           | 2/161           | 1.2 ( to 0.2 to 2.6)  | 368/23922         | 1.5 (1.4 to 1.7)    | -0.3 (-1.7 to 1.0)         | 0.78 (0.25 to 2.44)    | 0.57 (0.18 to 1.82)                              |
| Admission               | 16/161          | 10.1 (2.6 to 17.7)    | 3044/23922        | 12.7 (12.3 to 13.1) | -2.6 (-10.1 to 4.9)        | 0.79 (0.38 to 1.67)    | 0.52 (0.25 to 1.07)                              |
| <i>Matching weights</i> |                 |                       |                   |                     |                            |                        |                                                  |
| Death                   | 8/171           | 4.7 (1.5 to 7.9)      | 9/170             | 5.0 (4.4 to 5.7)    | -0.4 (-3.6 to 2.9)         | 0.93 (0.47 to 1.85)    | 0.75 (0.28 to 1.99)                              |
| ICU admission           | 5/171           | 2.9 (0.4 to 5.5)      | 5/170             | 2.8 (2.4 to 3.3)    | 0.1 (-2.5 to 2.7)          | 1.03 (0.43 to 2.49)    | 1.48 (0.46 to 4.75)                              |
| Admission               | 33/171          | 19.3 (13.4 to 25.2)   | 40/170            | 23.5 (22.3 to 24.7) | -4.2 (-10.2 to 1.8)        | 0.82 (0.60 to 1.12)    | 0.75 (0.49 to 1.14)                              |

Abbreviations: ICU; intensive care unit. Numbers of exposed and unexposed in the propensity score weighted dataset are weighted subjects and do not refer to individual subjects.

**Appendix Table A7. Relative risk of severe outcomes of SARS-CoV-2 infection for patients exposed to systemic glucocorticoids compared to unexposed patients, with crude, inverse probability of treatment weighting (IPTW) and matching weights models, with further adjustment for antianaemic drugs.**

| Outcome                 | Events/ Exposed | Risk % (95%CI)       | Events/ Unexposed | Risk % (95% CI)     | Risk difference % (95% CI) | Relative risk (95% CI) | Relative risk adjusted for antianaemics (95% CI) |
|-------------------------|-----------------|----------------------|-------------------|---------------------|----------------------------|------------------------|--------------------------------------------------|
| <i>Crude</i>            |                 |                      |                   |                     |                            |                        |                                                  |
| Death                   | 42/136          | 30.9 (23.1 to 38.7)  | 658/36200         | 1.8 (1.7 to 2.0)    | 29.1 (21.3 to 36.8)        | 16.99 (13.07 to 22.09) | 8.33 (6.44 to 10.78)                             |
| ICU admission           | 10/136          | 7.4 (3.0 to 11.8)    | 400/36200         | 1.1 (1.0 to 1.2)    | 6.2 (1.9 to 10.6)          | 6.65 (3.64 to 12.18)   | 5.34 (2.90 to 9.86)                              |
| Hospital admission      | 83/136          | 61.0 (52.8 to 69.3)  | 3373/36200        | 9.3 (9.0 to 9.6)    | 51.7 (43.5 to 59.9)        | 6.55 (5.71 to 7.52)    | 3.78 (3.32 to 4.30)                              |
| <i>IPTW</i>             |                 |                      |                   |                     |                            |                        |                                                  |
| Death                   | 5/70            | 7.6 (2.0 to 13.1)    | 565/18196         | 3.1 (2.8 to 3.4)    | 4.5 (-1.0 to 10.0)         | 2.45 (1.18 to 5.08)    | 2.07 (1.06 to 4.05)                              |
| ICU admission           | 2/70            | 2.2 ( to 0.2 to 4.6) | 362/18196         | 2.0 (1.8 to 2.2)    | 0.2 (-2.1 to 2.6)          | 1.12 (0.38 to 3.28)    | 1.08 (0.37 to 3.09)                              |
| Hospital admission      | 25/70           | 35.4 (7.9 to 62.9)   | 2911/18196        | 16.0 (15.5 to 16.5) | 19.4 (-7.9 to 46.7)        | 2.21 (1.02 to 4.79)    | 1.96 (0.97 to 3.96)                              |
| <i>Matching weights</i> |                 |                      |                   |                     |                            |                        |                                                  |
| Death                   | 28/94           | 29.8 (20.5 to 39.1)  | 11/85             | 12.5 (11.2 to 13.8) | 17.3 (7.9 to 26.6)         | 2.38 (1.72 to 3.30)    | 2.36 (1.69 to 3.28)                              |
| ICU admission           | 9/94            | 9.6 (3.6 to 15.6)    | 5/85              | 5.4 (4.6 to 6.3)    | 4.1 (-1.9 to 10.2)         | 1.76 (0.93 to 3.35)    | 1.75 (0.92 to 3.32)                              |
| Hospital admission      | 50/94           | 53.2 (43.1 to 63.3)  | 34/85             | 39.8 (38.1 to 41.5) | 13.4 (3.2 to 23.6)         | 1.34 (1.10 to 1.62)    | 1.34 (1.10 to 1.64)                              |

Abbreviations: ICU; intensive care unit. Numbers of exposed and unexposed in the propensity score weighted dataset are weighted subjects and do not refer to individual subjects.

**Appendix Table A8. Relative risk of severe outcomes of SARS-CoV-2 infection in patients exposed to cumulative dose <2000mg (moderate dose) or ≥2000mg (high dose) compared to unexposed patients, with crude, inverse probability of treatment weighting (IPTW) and matching weights models, with further adjustment for antianaemic drugs.**

| Outcome                 | Events/ Exposed | Risk % (95%CI)        | Events/ Unexposed | Risk % (95% CI)     | Risk difference % (95% CI) | Relative risk (95% CI) | Relative risk adjusted for antianaemics (95%CI) |
|-------------------------|-----------------|-----------------------|-------------------|---------------------|----------------------------|------------------------|-------------------------------------------------|
| <i>Crude</i>            |                 |                       |                   |                     |                            |                        |                                                 |
| Death                   |                 |                       |                   |                     |                            |                        |                                                 |
| Moderate dose           | 18/69           | 26.1 (15.7 to 36.5)   | 658/36200         | 1.8 (1.7 to 2.0)    | 24.3 (13.9 to 34.6)        | 14.35 (9.58 to 21.50)  | 1.70 (1.16 to 2.49)                             |
| High dose               | 24/67           | 35.8 (24.3 to 47.4)   | 658/36200         | 1.8 (1.7 to 2.0)    | 34.0 (22.5 to 45.5)        | 19.71 (14.18 to 27.39) | 4.79 (. to .)                                   |
| ICU admission           |                 |                       |                   |                     |                            |                        |                                                 |
| Moderate dose           | 5/69            | 7.2 (1.1 to 13.4)     | 400/36200         | 1.1 (1.0 to 1.2)    | 6.1 (0.0 to 12.3)          | 6.56 (2.80 to 15.34)   | 5.41 (2.31 to 12.68)                            |
| High dose               | 5/67            | 7.5 (1.1 to 13.8)     | 400/36200         | 1.1 (1.0 to 1.2)    | 6.4 (0.1 to 12.7)          | 6.75 (2.89 to 15.78)   | 5.28 (2.26 to 12.36)                            |
| Hospital admission      |                 |                       |                   |                     |                            |                        |                                                 |
| Moderate dose           | 38/69           | 55.1 (43.2 to 66.9)   | 3373/36200        | 9.3 (9.0 to 9.6)    | 45.8 (34.0 to 57.5)        | 5.91 (4.76 to 7.33)    | 3.77 (3.16 to 4.50)                             |
| High dose               | 45/67           | 67.2 (55.8 to 78.5)   | 3373/36200        | 9.3 (9.0 to 9.6)    | 57.8 (46.6 to 69.1)        | 7.21 (6.08 to 8.55)    | 3.79 (3.23 to 4.44)                             |
| <i>IPTW</i>             |                 |                       |                   |                     |                            |                        |                                                 |
| Death                   |                 |                       |                   |                     |                            |                        |                                                 |
| Moderate dose           | 2/39            | 6.0 ( to 0.5 to 12.5) | 565/18196         | 3.1 (2.8 to 3.4)    | 2.9 (-3.5 to 9.3)          | 1.93 (0.66 to 5.64)    | 1.98 (0.73 to 5.39)                             |
| High dose               | 3/31            | 9.6 ( to 0.5 to 19.7) | 565/18196         | 3.1 (2.8 to 3.4)    | 6.5 (-3.5 to 16.4)         | 3.09 (1.09 to 8.76)    | 2.15 (0.87 to 5.28)                             |
| ICU admission           |                 |                       |                   |                     |                            |                        |                                                 |
| Moderate dose           | 1/39            | 2.9 ( to 1.2 to 7.1)  | 362/18196         | 2.0 (1.8 to 2.2)    | 1.0 (-3.1 to 5.0)          | 1.48 (0.37 to 5.91)    | 1.48 (0.38 to 5.81)                             |
| High dose               | 0/31            | 1.4 ( to 0.5 to 3.2)  | 362/18196         | 2.0 (1.8 to 2.2)    | -0.6 (-2.5 to 1.2)         | 0.68 (0.18 to 2.63)    | 0.62 (0.17 to 2.29)                             |
| Hospital admission      |                 |                       |                   |                     |                            |                        |                                                 |
| Moderate dose           | 17/39           | 44.2 (5.7 to 82.6)    | 2911/18196        | 16.0 (15.5 to 16.5) | 28.2 (-9.9 to 66.2)        | 2.76 (1.16 to 6.54)    | 1.87 (. to .)                                   |
| High dose               | 8/31            | 24.5 (0.1 to 48.9)    | 2911/18196        | 16.0 (15.5 to 16.5) | 8.5 (-15.6 to 32.6)        | 1.53 (0.57 to 4.10)    | 0.53 (0.21 to 1.30)                             |
| <i>Matching weights</i> |                 |                       |                   |                     |                            |                        |                                                 |
| Death                   |                 |                       |                   |                     |                            |                        |                                                 |
| Moderate dose           | 11/48           | 22.9 (10.9 to 34.9)   | 11/85             | 12.5 (11.2 to 13.8) | 10.4 (-1.5 to 22.4)        | 1.83 (1.08 to 3.11)    | 1.84 (1.08 to 3.13)                             |
| High dose               | 17/46           | 37.0 (22.9 to 51.1)   | 11/85             | 12.5 (11.2 to 13.8) | 24.5 (10.4 to 38.5)        | 2.96 (2.00 to 4.37)    | 2.91 (1.92 to 4.39)                             |
| ICU admission           |                 |                       |                   |                     |                            |                        |                                                 |
| Moderate dose           | 5/48            | 10.4 (1.7 to 19.1)    | 5/85              | 5.4 (4.6 to 6.3)    | 5.0 (-3.7 to 13.7)         | 1.92 (0.83 to 4.46)    | 1.92 (0.82 to 4.46)                             |
| High dose               | 4/46            | 8.7 (0.5 to 16.9)     | 5/85              | 5.4 (4.6 to 6.3)    | 3.3 (-4.9 to 11.5)         | 1.60 (0.62 to 4.14)    | 1.58 (0.62 to 4.04)                             |
| Hospital admission      |                 |                       |                   |                     |                            |                        |                                                 |
| Moderate dose           | 23/48           | 47.9 (33.6 to 62.2)   | 34/85             | 39.8 (38.1 to 41.5) | 8.1 (-6.1 to 22.3)         | 1.20 (0.89 to 1.62)    | 1.21 (0.90 to 1.63)                             |
| High dose               | 27/46           | 58.7 (44.3 to 73.1)   | 34/85             | 39.8 (38.1 to 41.5) | 18.9 (4.6 to 33.2)         | 1.47 (1.15 to 1.89)    | 1.50 (1.16 to 1.94)                             |

Abbreviations: ICU; intensive care unit. Numbers of exposed and unexposed in the propensity score weighted dataset are weighted subjects and do not refer to individual subjects.

**Appendix Table A9. Relative risk of severe outcomes of SARS-CoV-2 infection in current users versus former users of immunosuppressants, with crude, inverse probability of treatment weighting (IPTW) and matching weights models, with further adjustment for antianaemic drugs.**

| Outcome                 | Events/ Exposed | Risk % (95%CI)      | Events/ Unexposed | Risk % (95% CI)     | Risk difference % (95% CI) | Relative risk (95% CI) | Relative risk adjusted for antianaemics (95%CI) |
|-------------------------|-----------------|---------------------|-------------------|---------------------|----------------------------|------------------------|-------------------------------------------------|
| <i>Crude</i>            |                 |                     |                   |                     |                            |                        |                                                 |
| Death                   | 57/527          | 10.8 (8.2 to 13.5)  | 14/177            | 7.9 (3.9 to 11.9)   | 2.9 (-1.9 to 7.7)          | 1.37 (0.78 to 2.39)    | 1.37 (0.79 to 2.40)                             |
| ICU admission           | -               | -                   | -                 | -                   | -                          | 2.80 (0.85 to 9.17)    | 2.81 (0.86 to 9.17)                             |
| Admission               | 165/527         | 31.3 (27.3 to 35.3) | 43/177            | 24.3 (18.0 to 30.6) | 7.0 (-0.4 to 14.5)         | 1.29 (0.96 to 1.72)    | 1.30 (0.97 to 1.74)                             |
| <i>IPTW</i>             |                 |                     |                   |                     |                            |                        |                                                 |
| Death                   | 55/509          | 10.8 (8.1 to 13.4)  | 16/171            | 9.6 (4.6 to 14.6)   | 1.2 (-4.5 to 6.9)          | 1.12 (0.63 to 2.00)    | 1.12 (0.63 to 2.00)                             |
| ICU admission           | 23/509          | 4.5 (2.7 to 6.3)    | 4/171             | 2.5 (-0.4 to 5.5)   | 1.9 (-1.5 to 5.4)          | 1.76 (0.52 to 5.96)    | 1.76 (0.52 to 5.94)                             |
| Hospital admission      | 155/509         | 30.4 (26.4 to 34.4) | 52/171            | 30.4 (22.5 to 38.3) | -0.0 (-8.8 to 8.8)         | 1.00 (0.75 to 1.34)    | 1.01 (0.75 to 1.35)                             |
| <i>Matching weights</i> |                 |                     |                   |                     |                            |                        |                                                 |
| Death                   | 17/168          | 10.2 (7.3 to 13.1)  | 14/166            | 8.4 (4.2 to 12.7)   | 1.8 (-3.3 to 6.9)          | 1.21 (0.68 to 2.15)    | 1.22 (0.69 to 2.16)                             |
| ICU admission           | -               | -                   | -                 | -                   | -                          | 2.39 (0.71 to 8.11)    | 2.39 (0.71 to 8.08)                             |
| Hospital admission      | 48/168          | 28.5 (24.2 to 32.8) | 42/166            | 25.3 (18.7 to 31.9) | 3.2 (-4.7 to 11.1)         | 1.13 (0.83 to 1.52)    | 1.12 (0.83 to 1.53)                             |

Abbreviations: ICU; intensive care unit. Numbers of exposed and unexposed in the propensity score weighted dataset are weighted subjects and do not refer to individual subjects.

**Appendix Table A10. Relative risk of severe outcomes of SARS-CoV-2 infection in patients admitted to hospital with COVID-19 exposed to immunosuppressants, compared to unexposed patients, with crude, inverse probability of treatment weighting (IPTW) and matching weights models, with further adjustment for antianaemic drugs.**

| Outcome                 | Events/ Exposed | Risk % (95%CI)      | Events/ Unexposed | Risk % (95% CI)     | Risk difference % (95% CI) | Relative risk (95% CI) | Relative risk adjusted for antianaemics (95% CI) |
|-------------------------|-----------------|---------------------|-------------------|---------------------|----------------------------|------------------------|--------------------------------------------------|
| <i>Crude</i>            |                 |                     |                   |                     |                            |                        |                                                  |
| Death                   | 42/165          | 25.5 (18.8 to 32.1) | 467/3373          | 13.8 (12.7 to 15.0) | 11.6 (4.9 to 18.4)         | 1.84 (1.40 to 2.42)    | 1.48 (1.11 to 1.97)                              |
| ICU admission           | 19/165          | 11.5 (6.6 to 16.4)  | 387/3373          | 11.5 (10.4 to 12.5) | 0.0 (-4.9 to 5.0)          | 1.00 (0.65 to 1.55)    | 1.05 (0.68 to 1.62)                              |
| <i>IPTW</i>             |                 |                     |                   |                     |                            |                        |                                                  |
| Death                   | 43/116          | 37.3 (19.4 to 55.3) | 372/2180          | 17.1 (15.5 to 18.6) | 20.3 (2.3 to 38.3)         | 2.19 (1.34 to 3.57)    | 2.13 (1.33 to 3.38)                              |
| ICU admission           | 10/116          | 8.4 (1.0 to 15.8)   | 259/2180          | 11.9 (10.5 to 13.2) | -3.5 (-11.0 to 4.0)        | 0.71 (0.29 to 1.72)    | 0.71 (0.29 to 1.72)                              |
| <i>Matching weights</i> |                 |                     |                   |                     |                            |                        |                                                  |
| Death                   | 32/120          | 26.7 (18.7 to 34.6) | 25/122            | 20.4 (17.4 to 23.5) | 6.2 (-2.2 to 14.7)         | 1.30 (0.94 to 1.82)    | 1.31 (0.94 to 1.82)                              |
| ICU admission           | 12/120          | 10.0 (4.6 to 15.4)  | 14/122            | 11.3 (9.2 to 13.4)  | -1.3 (-7.0 to 4.5)         | 0.89 (0.50 to 1.56)    | 0.88 (0.50 to 1.55)                              |

Abbreviations: ICU; intensive care unit. Numbers of exposed and unexposed in the propensity score weighted dataset are weighted subjects and do not refer to individual subjects.

**Appendix Table A11. Relative risk of severe outcomes of SARS-CoV-2 infection in patients exposed to immunosuppressants, 26 February–20 April, with crude, inverse probability of treatment weighting (IPTW) and matching weights models, with further adjustment for antianaemic drugs.**

| Outcome                 | Events/<br>Exposed | Risk % (95%CI)      | Events/<br>Unexposed | Risk % (95% CI)     | Risk difference %<br>(95% CI) | Relative risk (95% CI) | Relative risk adjusted for<br>antianaemics (95% CI) |
|-------------------------|--------------------|---------------------|----------------------|---------------------|-------------------------------|------------------------|-----------------------------------------------------|
| <i>Crude</i>            |                    |                     |                      |                     |                               |                        |                                                     |
| Death                   | 34/199             | 17.1 (11.8 to 22.3) | 439/7794             | 5.6 (5.1 to 6.1)    | 11.5 (6.2 to 16.7)            | 3.03 (2.20 to 4.17)    | 1.61 (1.13 to 2.29)                                 |
| ICU admission           | 13/199             | 6.5 (3.1 to 10.0)   | 288/7794             | 3.7 (3.3 to 4.1)    | 2.8 (-0.6 to 6.3)             | 1.77 (1.03 to 3.03)    | 1.48 (0.83 to 2.62)                                 |
| Admission               | 94/199             | 47.2 (40.3 to 54.2) | 1951/7794            | 25.0 (24.1 to 26.0) | 22.2 (15.2 to 29.2)           | 1.89 (1.62 to 2.20)    | 1.37 (1.17 to 1.62)                                 |
| <i>IPTW</i>             |                    |                     |                      |                     |                               |                        |                                                     |
| Death                   | 29/106             | 27.5 (9.1 to 45.9)  | 420/6258             | 6.7 (6.1 to 7.3)    | 20.8 (2.5 to 39.1)            | 4.10 (2.09 to 8.03)    | 2.90 (1.47 to 5.73)                                 |
| ICU admission           | 2/106              | 1.7 (0.2 to 3.3)    | 263/6258             | 4.2 (3.7 to 4.7)    | -2.5 (-4.1 to -0.9)           | 0.41 (0.16 to 1.02)    | 0.39 (0.16 to 0.96)                                 |
| Admission               | 42/106             | 39.8 (24.2 to 55.5) | 1793/6258            | 28.6 (27.5 to 29.8) | 11.2 (-4.5 to 26.8)           | 1.39 (0.94 to 2.06)    | 1.21 (0.84 to 1.75)                                 |
| <i>Matching weights</i> |                    |                     |                      |                     |                               |                        |                                                     |
| Death                   | 21/136             | 15.4 (9.3 to 21.5)  | 19/134               | 14.5 (12.2 to 16.8) | 0.9 (-5.6 to 7.4)             | 1.06 (0.70 to 1.63)    | 1.08 (0.69 to 1.68)                                 |
| ICU admission           | 6/136              | 4.4 (0.9 to 7.9)    | 9/134                | 6.8 (5.3 to 8.3)    | -2.4 (-6.1 to 1.4)            | 0.65 (0.29 to 1.46)    | 0.67 (0.29 to 1.52)                                 |
| Admission               | 64/136             | 47.1 (38.6 to 55.5) | 63/134               | 47.4 (44.5 to 50.4) | -0.4 (-9.3 to 8.5)            | 0.99 (0.82 to 1.20)    | 1.00 (0.82 to 1.22)                                 |

Abbreviations: ICU; intensive care unit. Numbers of exposed and unexposed in the propensity score weighted dataset are weighted subjects and do not refer to individual subjects.

**Appendix Table A12. Relative risk of severe outcomes of SARS-CoV-2 infection in patients exposed to immunosuppressants, 21 April–18 October, with crude, inverse probability of treatment weighting (IPTW) and matching weights models, with further adjustment for antianaemic drugs.**

| Outcome                 | Events/<br>Exposed | Risk % (95%CI)       | Events/<br>Unexposed | Risk % (95% CI)     | Risk difference %<br>(95% CI) | Relative risk (95% CI) | Relative risk adjusted for<br>antianaemics (95% CI) |
|-------------------------|--------------------|----------------------|----------------------|---------------------|-------------------------------|------------------------|-----------------------------------------------------|
| <i>Crude</i>            |                    |                      |                      |                     |                               |                        |                                                     |
| Death                   | 23/328             | 7.0 (4.2 to 9.8)     | 219/28406            | 0.8 (0.7 to 0.9)    | 6.2 (3.5 to 9.0)              | 9.10 (6.00 to 13.78)   | 3.32 (2.02 to 5.45)                                 |
| ICU admission           | 12/328             | 3.7 (1.6 to 5.7)     | 112/28406            | 0.4 (0.3 to 0.5)    | 3.3 (1.2 to 5.3)              | 9.28 (5.17 to 16.66)   | 6.19 (2.91 to 13.17)                                |
| Hospital admission      | 71/328             | 21.6 (17.2 to 26.1)  | 1422/28406           | 5.0 (4.8 to 5.3)    | 16.6 (12.2 to 21.1)           | 4.32 (3.50 to 5.35)    | 2.26 (1.78 to 2.87)                                 |
| <i>IPTW</i>             |                    |                      |                      |                     |                               |                        |                                                     |
| Death                   | 13/146             | 8.8 (1.3 to 16.3)    | 198/18300            | 1.1 (0.9 to 1.2)    | 7.7 (0.3 to 15.2)             | 8.13 (3.44 to 19.19)   | 6.32 (2.79 to 14.28)                                |
| ICU admission           | 5/146              | 3.1 ( to 0.5 to 6.7) | 98/18300             | 0.5 (0.4 to 0.6)    | 2.6 (-1.1 to 6.2)             | 5.76 (1.75 to 18.92)   | 5.43 (1.65 to 17.89)                                |
| Hospital admission      | 25/146             | 17.2 (6.9 to 27.5)   | 1226/18300           | 6.7 (6.3 to 7.1)    | 10.5 (0.2 to 20.8)            | 2.57 (1.41 to 4.68)    | 2.27 (1.30 to 3.96)                                 |
| <i>Matching weights</i> |                    |                      |                      |                     |                               |                        |                                                     |
| Death                   | 15/183             | 8.2 (4.2 to 12.2)    | 6/178                | 3.1 (2.4 to 3.9)    | 5.1 (1.0 to 9.1)              | 2.60 (1.52 to 4.46)    | 2.64 (1.51 to 4.64)                                 |
| ICU admission           | -                  | -                    | -                    | -                   | -                             | 3.23 (1.50 to 6.98)    | 3.41 (1.56 to 7.43)                                 |
| Hospital admission      | 39/183             | 21.3 (15.4 to 27.3)  | 28/178               | 15.9 (14.4 to 17.3) | 5.5 (-0.6 to 11.6)            | 1.34 (1.00 to 1.80)    | 1.42 (1.05 to 1.92)                                 |

Abbreviations: ICU; intensive care unit. Numbers of exposed and unexposed in the propensity score weighted dataset are weighted subjects and do not refer to individual subjects.

**Appendix Figure A1. Standardised mean differences of covariates with unadjusted (crude), inverse probability of treatment weighting and matching weights models, for patients exposed to immunosuppressants compared to unexposed.**

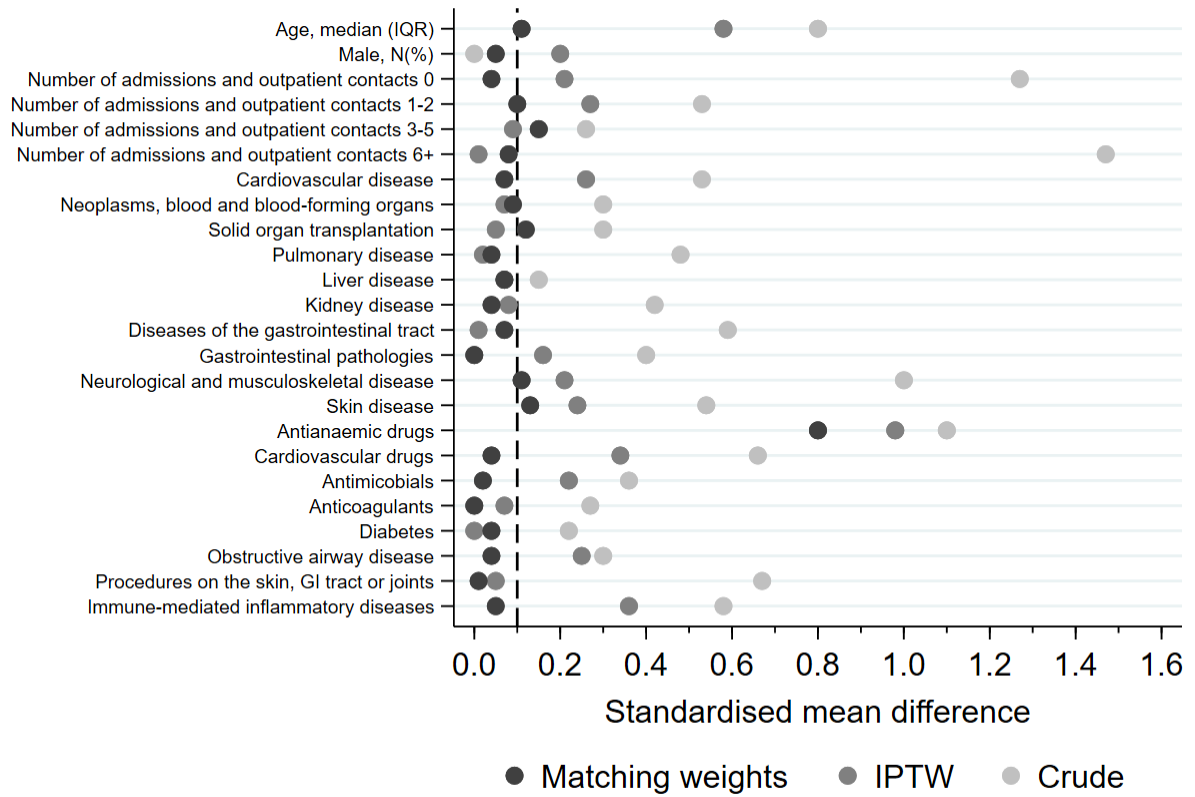

Abbreviations: IPTW: inverse probability of treatment weighting.

**Appendix Table A13. Characteristics of SARS-CoV-2 PCR test positive patients in Denmark 26 February–18 October 2020, by exposure to immunosuppressants, and with inverse probability of treatment weighting (IPTW) and matching weights propensity score models.**

| Characteristics                                     | Unadjusted      |                      |      | Adjusted with IPTW |                      |      | Adjusted with matching weights |                   |      |
|-----------------------------------------------------|-----------------|----------------------|------|--------------------|----------------------|------|--------------------------------|-------------------|------|
|                                                     | Exposed (n=527) | Unexposed (n=36,200) | SMD  | Exposed (n=273)    | Unexposed (n=22,570) | SMD  | Exposed (n=346)                | Unexposed (n=339) | SMD  |
| Age, median (IQR)                                   | 57 (42-73)      | 39 (23-55)           | 0.80 | 57 (41-77)         | 47 (29-60)           | 0.58 | 57 (43-74)                     | 56 (41-71)        | 0.11 |
| Male, N (%)                                         | 256 (48.6)      | 17,544 (48.5)        | 0.00 | 104 (38.1)         | 10,810 (47.9)        | 0.20 | 149 (43.1)                     | 154 (45.4)        | 0.05 |
| <b>Number of admissions and outpatient contacts</b> | <b>N (%)</b>    | <b>N (%)</b>         |      | <b>N (%)</b>       | <b>N (%)</b>         |      | <b>N (%)</b>                   | <b>N (%)</b>      |      |
| 0                                                   | 20 (3.8)        | 18,787 (51.9)        | 1.27 | 92 (33.7)          | 5,449 (24.1)         | 0.21 | 14 (4.0)                       | 11 (3.4)          | 0.04 |
| 1-2                                                 | 38 (7.2)        | 9,574 (26.4)         | 0.53 | 80 (29.4)          | 9,474 (42.0)         | 0.27 | 36 (10.4)                      | 47 (13.8)         | 0.10 |
| 3-5                                                 | 113 (21.4)      | 4,264 (11.8)         | 0.26 | 61 (22.4)          | 4,243 (18.8)         | 0.09 | 107 (30.9)                     | 82 (24.2)         | 0.15 |
| 6+                                                  | 356 (67.6)      | 3,575 (9.9)          | 1.47 | 40 (14.6)          | 3,404 (15.1)         | 0.01 | 189 (54.6)                     | 199 (58.7)        | 0.08 |
| <b>Diagnoses</b>                                    | <b>N (%)</b>    | <b>N (%)</b>         |      | <b>N (%)</b>       | <b>N (%)</b>         |      | <b>N (%)</b>                   | <b>N (%)</b>      |      |
| Cardiovascular disease                              | 176 (33.4)      | 4,269 (11.8)         | 0.53 | 73 (26.7)          | 3,601 (16.0)         | 0.26 | 111 (32.1)                     | 98 (29.0)         | 0.07 |
| Neoplasms, blood and blood-forming organs           | 27 (5.1)        | 101 (0.3)            | 0.30 | 0 (0.0)            | 71 (0.3)             | 0.07 | 1 (0.3)                        | (n<5)             | 0.09 |
| Solid organ transplantation                         | 24 (4.6)        | 27 (0.1)             | 0.30 | 0 (0.1)            | (n<5)                | 0.05 | (n<5)                          | 0 (0.0)           | 0.12 |
| Pulmonary disease                                   | 131 (24.9)      | 2,742 (7.6)          | 0.48 | 31 (11.3)          | 2,435 (10.8)         | 0.02 | 73 (21.1)                      | 66 (19.6)         | 0.04 |
| Liver disease                                       | 15 (2.8)        | 302 (0.8)            | 0.15 | 5 (1.9)            | 253 (1.1)            | 0.07 | 11 (3.2)                       | 7 (2.0)           | 0.07 |
| Kidney disease                                      | 76 (14.4)       | 1,049 (2.9)          | 0.42 | 15 (5.5)           | 856 (3.8)            | 0.08 | 34 (9.8)                       | 30 (8.8)          | 0.04 |
| Diseases of the gastrointestinal tract              | 91 (17.3)       | 365 (1.0)            | 0.59 | (n<5)              | 257 (1.1)            | 0.01 | 17 (4.9)                       | 12 (3.4)          | 0.07 |
| Gastrointestinal pathologies                        | 94 (17.8)       | 1,934 (5.3)          | 0.40 | 10 (3.6)           | 1,616 (7.2)          | 0.16 | 43 (12.4)                      | 43 (12.5)         | 0.00 |
| Neurological and musculoskeletal disease            | 353 (67.0)      | 8,101 (22.4)         | 1.00 | 123 (45.1)         | 7,896 (35.0)         | 0.21 | 231 (66.8)                     | 209 (61.7)        | 0.11 |
| Skin disease                                        | 112 (21.3)      | 1,399 (3.9)          | 0.54 | 33 (12.3)          | 1,244 (5.5)          | 0.24 | 51 (14.7)                      | 35 (10.3)         | 0.13 |
| <b>Medications</b>                                  | <b>N (%)</b>    | <b>N (%)</b>         |      | <b>N (%)</b>       | <b>N (%)</b>         |      | <b>N (%)</b>                   | <b>N (%)</b>      |      |
| Antianaemic drugs                                   | 276 (52.4)      | 2,946 (8.1)          | 1.10 | 139 (51.0)         | 2,341 (10.4)         | 0.98 | 185 (53.5)                     | 61 (18.0)         | 0.80 |
| Cardiovascular drugs                                | 370 (70.2)      | 14,144 (39.1)        | 0.66 | 178 (65.2)         | 10,921 (48.4)        | 0.34 | 235 (67.9)                     | 224 (66.2)        | 0.04 |
| Antimicrobials                                      | 515 (97.7)      | 32,201 (89.0)        | 0.36 | 267 (98.0)         | 21,136 (93.6)        | 0.22 | 335 (96.8)                     | 329 (97.1)        | 0.02 |
| Anticoagulants                                      | 39 (7.4)        | 633 (1.7)            | 0.27 | (n<5)              | 551 (2.4)            | 0.07 | 19 (5.5)                       | 19 (5.5)          | 0.00 |
| Diabetes                                            | 65 (12.3)       | 2,211 (6.1)          | 0.22 | 22 (8.0)           | 1,779 (7.9)          | 0.00 | 44 (12.7)                      | 39 (11.4)         | 0.04 |
| Obstructive airway disease                          | 212 (40.2)      | 9,502 (26.2)         | 0.30 | 111 (40.7)         | 6,483 (28.7)         | 0.25 | 135 (39.0)                     | 126 (37.1)        | 0.04 |
| <b>Proxies for IMID severity</b>                    | <b>N (%)</b>    | <b>N (%)</b>         |      | <b>N (%)</b>       | <b>N (%)</b>         |      | <b>N (%)</b>                   | <b>N (%)</b>      |      |
| Procedures on the skin, GI tract or joints          | 162 (30.7)      | 2,239 (6.2)          | 0.67 | 22 (7.9)           | 2,131 (9.4)          | 0.05 | 82 (23.7)                      | 78 (23.1)         | 0.01 |
| Immune-mediated inflammatory disease drugs          | 252 (47.8)      | 7,651 (21.1)         | 0.58 | 124 (45.4)         | 6,384 (28.3)         | 0.36 | 156 (45.1)                     | 144 (42.6)        | 0.05 |

Abbreviations: IMID; immune mediated inflammatory diseases.



**Appendix Table A14. Characteristics of SARS-CoV-2 PCR test positive patients in Denmark 26 February–18 October 2020, by exposure to selective immunosuppressants, TNF inhibitors, interleukin inhibitors, with inverse probability of treatment weighting (IPTW) and matching weights propensity score models.**

| Characteristics                                     | Unadjusted      |                      |      | Adjusted with IPTW |                    |      | Adjusted with matching weights |                  |      |
|-----------------------------------------------------|-----------------|----------------------|------|--------------------|--------------------|------|--------------------------------|------------------|------|
|                                                     | Exposed (n=192) | Unexposed (n=36,200) | SMD  | Exposed (n=46)     | Unexposed (n=8468) | SMD  | Exposed (n=87)                 | Unexposed (n=91) | SMD  |
| Age, median (IQR)                                   | 48 (33-58)      | 39 (23-55)           | 0.34 | 55 (29-61)         | 47 (30-61)         | 0.20 | 52 (40-62)                     | 47 (32-59)       | 0.23 |
| Male, N (%)                                         | 96 (50.0)       | 17,544 (48.5)        | 0.03 | 17 (37.5)          | 3,812 (45.0)       | 0.15 | 34 (39.1)                      | 38 (42.0)        | 0.06 |
| <b>Number of admissions and outpatient contacts</b> | <b>N (%)</b>    | <b>N (%)</b>         |      | <b>N (%)</b>       | <b>N (%)</b>       |      | <b>N (%)</b>                   | <b>N (%)</b>     |      |
| 0                                                   | n<5             | 18,787 (51.9)        | 1.47 | n<5                | 36 (0.4)           | 0.09 | n<5                            | 0 (0.1)          | 0.04 |
| 1-2                                                 | n<5             | 9,574 (26.4)         | 0.79 | 6 (12.0)           | 1,405 (16.6)       | 0.13 | n<5                            | (n<5)            | 0.11 |
| 3-5                                                 | 29 (15.1)       | 4,264 (11.8)         | 0.10 | 27 (59.1)          | 3,732 (44.1)       | 0.30 | 26 (29.9)                      | 16 (17.8)        | 0.29 |
| 6+                                                  | 161 (83.9)      | 3,575 (9.9)          | 2.21 | 13 (28.8)          | 3,295 (38.9)       | 0.21 | 60 (69.0)                      | 72 (79.5)        | 0.24 |
| <b>Diagnoses</b>                                    | <b>N (%)</b>    | <b>N (%)</b>         |      | <b>N (%)</b>       | <b>N (%)</b>       |      | <b>N (%)</b>                   | <b>N (%)</b>     |      |
| Cardiovascular disease                              | 42 (21.9)       | 4,269 (11.8)         | 0.27 | 20 (43.3)          | 1,750 (20.7)       | 0.50 | 25 (28.7)                      | 18 (19.6)        | 0.21 |
| Neoplasms, blood and blood-forming organs           | 5 (2.6)         | 101 (0.3)            | 0.20 | 1 (1.3)            | 50 (0.6)           | 0.07 | n<5                            | n<5              | 0.13 |
| Solid organ transplantation                         | 13 (6.8)        | 27 (0.1)             | 0.37 | 0 (0.5)            | 5 (0.1)            | 0.09 | n<5                            | 0 (0.1)          | 0.20 |
| Pulmonary disease                                   | 37 (19.3)       | 2,742 (7.6)          | 0.35 | 10 (22.4)          | 1,112 (13.1)       | 0.24 | 13 (14.9)                      | 14 (15.8)        | 0.02 |
| Liver disease                                       | 6 (3.1)         | 302 (0.8)            | 0.17 | 0 (0.8)            | 157 (1.8)          | 0.09 | n<5                            | n<5              | 0.10 |
| Kidney disease                                      | 23 (12.0)       | 1,049 (2.9)          | 0.35 | 9 (19.1)           | 534 (6.3)          | 0.39 | 8 (9.2)                        | 7 (7.7)          | 0.06 |
| Diseases of the gastrointestinal tract              | 59 (30.7)       | 365 (1.0)            | 0.89 | 0 (0.7)            | 206 (2.4)          | 0.14 | n<5                            | n<5              | 0.01 |
| Gastrointestinal pathologies                        | 36 (18.8)       | 1,934 (5.3)          | 0.42 | n<5                | 834 (9.8)          | 0.11 | 9 (10.3)                       | 11 (12.1)        | 0.06 |
| Neurological and musculoskeletal disease            | 135 (70.3)      | 8,101 (22.4)         | 1.10 | 26 (55.7)          | 3,931 (46.4)       | 0.19 | 65 (74.7)                      | 55 (60.7)        | 0.30 |
| Skin disease                                        | 48 (25.0)       | 1,399 (3.9)          | 0.63 | n<5                | 619 (7.3)          | 0.10 | 16 (18.4)                      | 10 (10.5)        | 0.23 |
| <b>Medications</b>                                  | <b>N (%)</b>    | <b>N (%)</b>         |      | <b>N (%)</b>       | <b>N (%)</b>       |      | <b>N (%)</b>                   | <b>N (%)</b>     |      |
| Antianaemic drugs                                   | 98 (51.0)       | 2,946 (8.1)          | 1.06 | 18 (39.6)          | 1,234 (14.6)       | 0.59 | 46 (52.9)                      | 15 (16.5)        | 0.83 |
| Cardiovascular drugs                                | 123 (64.1)      | 14,144 (39.1)        | 0.52 | 30 (63.6)          | 4,820 (56.9)       | 0.14 | 55 (63.2)                      | 55 (60.6)        | 0.05 |
| Antimicrobials                                      | 192 (100.0)     | 32,201 (89.0)        | 0.50 | 46 (100.0)         | 8,056 (95.1)       | 0.32 | 87 (100.0)                     | 88 (96.4)        | 0.28 |
| Anticoagulants                                      | 11 (5.7)        | 633 (1.7)            | 0.21 | n<5                | 295 (3.5)          | 0.05 | 5 (5.7)                        | n<5              | 0.12 |
| Diabetes                                            | 16 (8.3)        | 2,211 (6.1)          | 0.09 | 0 (0.9)            | 990 (11.7)         | 0.46 | (n<5)                          | 12 (13.3)        | 0.31 |
| Obstructive airway disease                          | 61 (31.8)       | 9,502 (26.2)         | 0.12 | 19 (41.0)          | 2,779 (32.8)       | 0.17 | 24 (27.6)                      | 32 (35.6)        | 0.17 |
| <b>Proxies for IMID severity</b>                    | <b>N (%)</b>    | <b>N (%)</b>         |      | <b>N (%)</b>       | <b>N (%)</b>       |      | <b>N (%)</b>                   | <b>N (%)</b>     |      |
| Procedures on the skin, GI tract or joints          | 62 (32.3)       | 2,239 (6.2)          | 0.70 | 7 (14.2)           | 1,504 (17.8)       | 0.10 | 21 (24.1)                      | 22 (23.7)        | 0.01 |
| Immune-mediated inflammatory disease drugs          | 89 (46.4)       | 7,651 (21.1)         | 0.55 | 19 (41.8)          | 2,901 (34.3)       | 0.16 | 40 (46.0)                      | 37 (40.8)        | 0.10 |

Abbreviations: IMID; immune mediated inflammatory diseases.

**Appendix Table A15. Characteristics of SARS-CoV-2 PCR test positive patients in Denmark 26 February–18 October 2020, by exposure to calcineurin inhibitors, other immunosuppressants, hydroxychloroquine or chloroquine with inverse probability of treatment weighting (IPTW) and matching weights propensity score models.**

| Characteristics                                     | Unadjusted      |                      |      | Adjusted with IPTW |                      |      | Adjusted with matching weights |                   |      |
|-----------------------------------------------------|-----------------|----------------------|------|--------------------|----------------------|------|--------------------------------|-------------------|------|
|                                                     | Exposed (n=268) | Unexposed (n=36,200) | SMD  | Exposed (n=161)    | Unexposed (n=23,922) | SMD  | Exposed (n=171)                | Unexposed (n=170) | SMD  |
| Age, median (IQR)                                   | 56 (44-69)      | 39 (23-55)           | 0.78 | 51 (40-70)         | 47 (30-60)           | 0.35 | 54 (40-70)                     | 54 (41-68)        | 0.01 |
| Male, N (%)                                         | 118 (44.0)      | 17,544 (48.5)        | 0.09 | 69 (42.9)          | 11,052 (46.2)        | 0.07 | 72 (42.1)                      | 72 (42.1)         | 0.00 |
| <b>Number of admissions and outpatient contacts</b> | <b>N (%)</b>    | <b>N (%)</b>         |      | <b>N (%)</b>       | <b>N (%)</b>         |      | <b>N (%)</b>                   | <b>N (%)</b>      |      |
| 0                                                   | 16 (6.0)        | 18,787 (51.9)        | 1.17 | 78 (48.2)          | 6,997 (29.2)         | 0.40 | 14 (8.2)                       | 10 (5.7)          | 0.10 |
| 1-2                                                 | 21 (7.8)        | 9,574 (26.4)         | 0.51 | 39 (24.1)          | 9,364 (39.1)         | 0.33 | 21 (12.3)                      | 29 (17.0)         | 0.13 |
| 3-5                                                 | 65 (24.3)       | 4,264 (11.8)         | 0.33 | 24 (15.1)          | 4,229 (17.7)         | 0.07 | 56 (32.7)                      | 43 (25.2)         | 0.17 |
| 6+                                                  | 166 (61.9)      | 3,575 (9.9)          | 1.29 | 20 (12.7)          | 3,333 (13.9)         | 0.04 | 80 (46.8)                      | 89 (52.1)         | 0.11 |
| <b>Diagnoses</b>                                    | <b>N (%)</b>    | <b>N (%)</b>         |      | <b>N (%)</b>       | <b>N (%)</b>         |      | <b>N (%)</b>                   | <b>N (%)</b>      |      |
| Cardiovascular disease                              | 83 (31.0)       | 4,269 (11.8)         | 0.48 | 32 (19.8)          | 3,546 (14.8)         | 0.13 | 46 (26.9)                      | 42 (24.6)         | 0.05 |
| Neoplasms, blood and blood-forming organs           | 20 (7.5)        | 101 (0.3)            | 0.38 | -                  | 56 (0.2)             | 0.07 | -                              | (n<5)             | 0.14 |
| Solid organ transplantation                         | 21 (7.8)        | 27 (0.1)             | 0.41 | -                  | -                    | -    | -                              | -                 | -    |
| Pulmonary disease                                   | 58 (21.6)       | 2,742 (7.6)          | 0.41 | 9 (5.4)            | 2,272 (9.5)          | 0.16 | 26 (15.2)                      | 30 (17.6)         | 0.06 |
| Liver disease                                       | 11 (4.1)        | 302 (0.8)            | 0.21 | (n<5)              | 266 (1.1)            | 0.04 | (n<5)                          | (n<5)             | 0.01 |
| Kidney disease                                      | 45 (16.8)       | 1,049 (2.9)          | 0.48 | 7 (4.2)            | 880 (3.7)            | 0.02 | 15 (8.8)                       | 15 (8.7)          | 0.00 |
| Diseases of the gastrointestinal tract              | 36 (13.4)       | 365 (1.0)            | 0.49 | (n<5)              | 275 (1.1)            | 0.08 | 12 (7.0)                       | 6 (3.5)           | 0.16 |
| Gastrointestinal pathologies                        | 42 (15.7)       | 1,934 (5.3)          | 0.34 | (n<5)              | 1,586 (6.6)          | 0.18 | 15 (8.8)                       | 19 (11.2)         | 0.08 |
| Neurological and musculoskeletal disease            | 183 (68.3)      | 8,101 (22.4)         | 1.04 | 59 (36.5)          | 7,839 (32.8)         | 0.08 | 113 (66.1)                     | 105 (62.0)        | 0.09 |
| Skin disease                                        | 66 (24.6)       | 1,399 (3.9)          | 0.62 | 19 (11.8)          | 1,207 (5.0)          | 0.24 | 30 (17.5)                      | 18 (10.4)         | 0.21 |
| <b>Medications</b>                                  | <b>N (%)</b>    | <b>N (%)</b>         |      | <b>N (%)</b>       | <b>N (%)</b>         |      | <b>N (%)</b>                   | <b>N (%)</b>      |      |
| Antianaemic drugs                                   | 182 (67.9)      | 2,946 (8.1)          | 1.56 | 98 (60.9)          | 2,446 (10.2)         | 1.25 | 119 (69.6)                     | 30 (17.6)         | 1.23 |
| Cardiovascular drugs                                | 188 (70.1)      | 14,144 (39.1)        | 0.66 | 111 (69.1)         | 11,808 (49.4)        | 0.41 | 107 (62.6)                     | 113 (66.7)        | 0.09 |
| Antimicrobials                                      | 261 (97.4)      | 32,201 (89.0)        | 0.34 | 147 (91.3)         | 22,228 (92.9)        | 0.06 | 164 (95.9)                     | 165 (96.9)        | 0.05 |
| Anticoagulants                                      | 16 (6.0)        | 633 (1.7)            | 0.22 | 1 (0.4)            | 546 (2.3)            | 0.17 | (n<5)                          | 8 (4.5)           | 0.12 |
| Diabetes                                            | 38 (14.2)       | 2,211 (6.1)          | 0.27 | 6 (3.6)            | 1,968 (8.2)          | 0.20 | 18 (10.5)                      | 24 (14.0)         | 0.11 |
| Obstructive airway disease                          | 100 (37.3)      | 9,502 (26.2)         | 0.24 | 52 (32.6)          | 6,703 (28.0)         | 0.10 | 58 (33.9)                      | 63 (36.8)         | 0.06 |
| <b>Proxies for IMID severity</b>                    | <b>N (%)</b>    | <b>N (%)</b>         |      | <b>N (%)</b>       | <b>N (%)</b>         |      | <b>N (%)</b>                   | <b>N (%)</b>      |      |
| Procedures on the skin, GI tract or joints          | 82 (30.6)       | 2,239 (6.2)          | 0.66 | 11 (7.1)           | 2,113 (8.8)          | 0.06 | 37 (21.6)                      | 40 (23.3)         | 0.04 |
| Immune-mediated inflammatory diseases               | 132 (49.3)      | 7,651 (21.1)         | 0.62 | 75 (46.9)          | 6,861 (28.7)         | 0.38 | 84 (49.1)                      | 77 (45.6)         | 0.07 |

Abbreviations: IMID; immune mediated inflammatory diseases.

**Appendix Table A16. Characteristics of SARS-CoV-2 PCR test positive patients in Denmark 26 February–18 October 2020, by exposure to systemic glucocorticoids with inverse probability of treatment weighting (IPTW) and matching weights propensity score models.**

| Characteristics                                     | Unadjusted      |                      |      | Adjusted with IPTW |                      |      | Adjusted with matching weights |                  |      |
|-----------------------------------------------------|-----------------|----------------------|------|--------------------|----------------------|------|--------------------------------|------------------|------|
|                                                     | Exposed (n=136) | Unexposed (n=36,200) | SMD  | Exposed (n=70)     | Unexposed (n=18,196) | SMD  | Exposed (n=94)                 | Unexposed (n=85) | SMD  |
| Age, median (IQR)                                   | 75 (65-82)      | 39 (23-55)           | 1.75 | 42 (29-60)         | 53 (42-64)           | 0.30 | 73 (60-82)                     | 71 (58-80)       | 0.09 |
| Male, N (%)                                         | 73 (53.7)       | 17,544 (48.5)        | 0.10 | 29 (41.1)          | 8,701 (47.8)         | 0.14 | 47 (50.0)                      | 43 (50.3)        | 0.01 |
| <b>Number of admissions and outpatient contacts</b> | <b>N (%)</b>    | <b>N (%)</b>         |      | <b>N (%)</b>       | <b>N (%)</b>         |      | <b>N (%)</b>                   | <b>N (%)</b>     |      |
| 0                                                   | 5 (3.7)         | 18,787 (51.9)        | 1.28 | 14 (19.5)          | 4,579 (25.2)         | 0.14 | n<5                            | n<5              | 0.03 |
| 1-2                                                 | 16 (11.8)       | 9,574 (26.4)         | 0.38 | 29 (41.3)          | 6,433 (35.4)         | 0.12 | 15 (16.0)                      | 14 (15.9)        | 0.00 |
| 3-5                                                 | 25 (18.4)       | 4,264 (11.8)         | 0.19 | 19 (27.3)          | 3,912 (21.5)         | 0.13 | 25 (26.6)                      | 23 (27.2)        | 0.01 |
| 6+                                                  | 90 (66.2)       | 3,575 (9.9)          | 1.42 | 8 (11.9)           | 3,271 (18.0)         | 0.17 | 50 (53.2)                      | 44 (52.0)        | 0.02 |
| <b>Diagnoses</b>                                    | <b>N (%)</b>    | <b>N (%)</b>         |      | <b>N (%)</b>       | <b>N (%)</b>         |      | <b>N (%)</b>                   | <b>N (%)</b>     |      |
| Cardiovascular disease                              | 81 (59.6)       | 4,269 (11.8)         | 1.15 | 14 (19.7)          | 3,722 (20.5)         | 0.02 | 52 (55.3)                      | 43 (50.3)        | 0.10 |
| Neoplasms, blood and blood-forming organs           | 7 (5.1)         | 101 (0.3)            | 0.30 | n<5                | 75 (0.4)             | 0.09 | n<5                            | n<5              | 0.16 |
| Solid organ transplantation                         | n<5             | 27 (0.1)             | 0.04 | n<5                | 27 (0.1)             | 0.05 | n<5                            | 0 (0.3)          | 0.08 |
| Pulmonary disease                                   | 57 (41.9)       | 2,742 (7.6)          | 0.87 | 6 (8.4)            | 1,989 (10.9)         | 0.09 | 29 (30.9)                      | 20 (23.7)        | 0.16 |
| Liver disease                                       | n<5             | 302 (0.8)            | 0.06 | n<5                | 237 (1.3)            | 0.03 | n<5                            | n<5              | 0.00 |
| Kidney disease                                      | 23 (16.9)       | 1,049 (2.9)          | 0.48 | n<5                | 736 (4.0)            | 0.03 | 16 (17.0)                      | 10 (11.9)        | 0.15 |
| Diseases of the gastrointestinal tract              | 15 (11.0)       | 365 (1.0)            | 0.43 | n<5                | 286 (1.6)            | 0.20 | 9 (9.6)                        | n<5              | 0.27 |
| Gastrointestinal pathologies                        | 27 (19.9)       | 1,934 (5.3)          | 0.45 | n<5                | 1,544 (8.5)          | 0.11 | 17 (18.1)                      | 14 (16.4)        | 0.04 |
| Neurological and musculoskeletal disease            | 82 (60.3)       | 8,101 (22.4)         | 0.83 | 34 (47.9)          | 6,594 (36.2)         | 0.24 | 53 (56.4)                      | 45 (53.2)        | 0.06 |
| Skin disease                                        | 11 (8.1)        | 1,399 (3.9)          | 0.18 | 6 (8.0)            | 848 (4.7)            | 0.14 | 9 (9.6)                        | 6 (6.8)          | 0.10 |
| <b>Medications</b>                                  | <b>N (%)</b>    | <b>N (%)</b>         |      | <b>N (%)</b>       | <b>N (%)</b>         |      | <b>N (%)</b>                   | <b>N (%)</b>     |      |
| Antianaemic drugs                                   | 38 (27.9)       | 2,946 (8.1)          | 0.53 | 14 (19.9)          | 2,191 (12.0)         | 0.22 | 25 (26.6)                      | 20 (23.2)        | 0.08 |
| Cardiovascular drugs                                | 113 (83.1)      | 14,144 (39.1)        | 1.01 | 38 (54.3)          | 10,704 (58.8)        | 0.09 | 75 (79.8)                      | 70 (82.7)        | 0.07 |
| Antimicrobials                                      | 130 (95.6)      | 32,201 (89.0)        | 0.25 | 67 (96.1)          | 17,146 (94.2)        | 0.09 | 90 (95.7)                      | 83 (97.7)        | 0.11 |
| Anticoagulants                                      | 18 (13.2)       | 633 (1.7)            | 0.45 | n<5                | 550 (3.0)            | 0.09 | 10 (10.6)                      | 8 (9.4)          | 0.04 |
| Diabetes                                            | 22 (16.2)       | 2,211 (6.1)          | 0.32 | 7 (10.0)           | 1,881 (10.3)         | 0.01 | 14 (14.9)                      | 17 (20.2)        | 0.14 |
| Obstructive airway disease                          | 74 (54.4)       | 9,502 (26.2)         | 0.60 | 23 (32.5)          | 5,180 (28.5)         | 0.09 | 44 (46.8)                      | 35 (41.3)        | 0.11 |
| <b>Proxies for IMID severity</b>                    | <b>N (%)</b>    | <b>N (%)</b>         |      | <b>N (%)</b>       | <b>N (%)</b>         |      | <b>N (%)</b>                   | <b>N (%)</b>     |      |
| Procedures on the skin, GI tract or joints          | 42 (30.9)       | 2,239 (6.2)          | 0.67 | 6 (8.7)            | 1,937 (10.6)         | 0.07 | 22 (23.4)                      | 22 (25.3)        | 0.04 |
| Immune-mediated inflammatory diseases               | 60 (44.1)       | 7,651 (21.1)         | 0.51 | 51 (72.5)          | 5,640 (31.0)         | 0.91 | 41 (43.6)                      | 35 (41.3)        | 0.05 |

Abbreviations: IMID; immune mediated inflammatory diseases.

**Appendix Table A17. Characteristics of SARS-CoV-2 PCR test positive patients in Denmark 26 February–18 October 2020, by current or former use of immunosuppressants, and with inverse probability of treatment weighting (IPTW) and matching weights propensity score models.**

| Characteristics                                     | Unadjusted      |                |      | Adjusted with IPTW |                |      | Adjusted with matching weights |                |      |
|-----------------------------------------------------|-----------------|----------------|------|--------------------|----------------|------|--------------------------------|----------------|------|
|                                                     | Current (n=527) | former (n=177) | SMD  | Current (n=509)    | former (n=171) | SMD  | Current (n=168)                | Former (n=166) | SMD  |
| Age, median (IQR)                                   | 57 (42-73)      | 54 (40-71)     | 0.10 | 56 (42-73)         | 58 (43-74)     | 0.05 | 56 (42-72)                     | 56 (42-72)     | 0.02 |
| Male, N (%)                                         | 256 (48.6)      | 81 (45.8)      | 0.06 | 242 (47.6)         | 81 (47.3)      | 0.01 | 77 (45.7)                      | 74 (44.6)      | 0.02 |
| <b>Number of admissions and outpatient contacts</b> | <b>N (%)</b>    | <b>N (%)</b>   |      | <b>N (%)</b>       | <b>N (%)</b>   |      | <b>N (%)</b>                   | <b>N (%)</b>   |      |
| 0                                                   | 20 (3.8)        | 16 (9.0)       | 0.22 | 21 (4.1)           | 6 (3.4)        | 0.04 | 11 (6.4)                       | 9 (5.4)        | 0.04 |
| 1-2                                                 | 38 (7.2)        | 25 (14.1)      | 0.23 | 43 (8.4)           | 16 (9.4)       | 0.04 | 19 (11.2)                      | 23 (13.9)      | 0.08 |
| 3-5                                                 | 113 (21.4)      | 34 (19.2)      | 0.06 | 115 (22.6)         | 33 (19.4)      | 0.08 | 42 (24.8)                      | 34 (20.5)      | 0.10 |
| 6+                                                  | 356 (67.6)      | 102 (57.6)     | 0.21 | 331 (65.0)         | 116 (67.9)     | 0.06 | 97 (57.6)                      | 100 (60.3)     | 0.05 |
| <b>Diagnoses</b>                                    | <b>N (%)</b>    | <b>N (%)</b>   |      | <b>N (%)</b>       | <b>N (%)</b>   |      | <b>N (%)</b>                   | <b>N (%)</b>   |      |
| Cardiovascular disease                              | 176 (33.4)      | 65 (36.7)      | 0.07 | 175 (34.5)         | 62 (36.0)      | 0.03 | 63 (37.8)                      | 63 (37.9)      | 0.00 |
| Neoplasms, blood and blood-forming organs           | 27 (5.1)        | 7 (4.0)        | 0.06 | 25 (4.9)           | (n<5)          | 0.10 | 6 (3.6)                        | 5 (3.0)        | 0.03 |
| Solid organ transplantation                         | 24 (4.6)        | 9 (5.1)        | 0.02 | 23 (4.4)           | 8 (4.8)        | 0.02 | 8 (4.9)                        | 9 (5.4)        | 0.03 |
| Pulmonary disease                                   | 131 (24.9)      | 39 (22.0)      | 0.07 | 125 (24.5)         | 42 (24.5)      | 0.00 | 39 (23.0)                      | 39 (23.5)      | 0.01 |
| Liver disease                                       | 15 (2.8)        | 8 (4.5)        | 0.09 | 15 (2.9)           | 7 (3.9)        | 0.05 | 7 (3.9)                        | 7 (4.2)        | 0.02 |
| Kidney disease                                      | 76 (14.4)       | 28 (15.8)      | 0.04 | 74 (14.6)          | 26 (15.3)      | 0.02 | 26 (15.5)                      | 27 (16.3)      | 0.02 |
| Diseases of the gastrointestinal tract              | 91 (17.3)       | 23 (13.0)      | 0.12 | 82 (16.1)          | 28 (16.2)      | 0.00 | 23 (13.5)                      | 22 (13.3)      | 0.01 |
| Gastrointestinal pathologies                        | 94 (17.8)       | 21 (11.9)      | 0.17 | 80 (15.8)          | 29 (17.1)      | 0.04 | 20 (12.0)                      | 21 (12.7)      | 0.02 |
| Neurological and musculoskeletal disease            | 353 (67.0)      | 105 (59.3)     | 0.16 | 333 (65.4)         | 115 (67.3)     | 0.04 | 102 (61.0)                     | 103 (62.0)     | 0.02 |
| Skin disease                                        | 112 (21.3)      | 34 (19.2)      | 0.05 | 107 (21.0)         | 35 (20.7)      | 0.01 | 34 (20.2)                      | 33 (19.9)      | 0.01 |
| <b>Medications</b>                                  | <b>N (%)</b>    | <b>N (%)</b>   |      | <b>N (%)</b>       | <b>N (%)</b>   |      | <b>N (%)</b>                   | <b>N (%)</b>   |      |
| Antianaemic drugs                                   | 276 (52.4)      | 92 (52.0)      | 0.01 | 266 (52.3)         | 89 (52.2)      | 0.00 | 87 (51.6)                      | 86 (51.8)      | 0.00 |
| Cardiovascular drugs                                | 370 (70.2)      | 125 (70.6)     | 0.01 | 359 (70.5)         | 126 (73.4)     | 0.07 | 120 (71.7)                     | 121 (72.9)     | 0.03 |
| Antimicrobials                                      | 515 (97.7)      | 167 (94.4)     | 0.17 | 497 (97.7)         | 169 (98.6)     | 0.06 | 162 (96.7)                     | 162 (97.6)     | 0.06 |
| Anticoagulants                                      | 39 (7.4)        | 12 (6.8)       | 0.02 | 33 (6.5)           | 11 (6.4)       | 0.00 | 10 (6.0)                       | 12 (7.2)       | 0.05 |
| Diabetes                                            | 65 (12.3)       | 26 (14.7)      | 0.07 | 65 (12.7)          | 21 (12.2)      | 0.02 | 23 (14.0)                      | 25 (15.0)      | 0.03 |
| Obstructive airway disease                          | 212 (40.2)      | 65 (36.7)      | 0.07 | 204 (40.1)         | 70 (40.8)      | 0.01 | 65 (38.9)                      | 64 (38.5)      | 0.01 |
| <b>Proxies for IMID severity</b>                    | <b>N (%)</b>    | <b>N (%)</b>   |      | <b>N (%)</b>       | <b>N (%)</b>   |      | <b>N (%)</b>                   | <b>N (%)</b>   |      |
| Procedures on the skin, GI tract or joints          | 162 (30.7)      | 52 (29.4)      | 0.03 | 156 (30.6)         | 50 (29.4)      | 0.03 | 50 (29.9)                      | 50 (30.1)      | 0.01 |
| Immune-mediated inflammatory disease drugs          | 252 (47.8)      | 80 (45.2)      | 0.05 | 236 (46.4)         | 79 (46.2)      | 0.00 | 74 (44.3)                      | 74 (44.6)      | 0.01 |

Abbreviations: IMID; immune mediated inflammatory diseases.

**Appendix Table A18. Characteristics of SARS-CoV-2 PCR test positive patients in Denmark 26 February–18 October 2020 restricted to those admitted with COVID-19, by exposure to immunosuppressants with inverse probability of treatment weighting (IPTW) and matching weights propensity score models.**

| Characteristics                                     | Unadjusted      |                     |      | Adjusted with IPTW |                    |      | Adjusted with matching weights |                   |      |
|-----------------------------------------------------|-----------------|---------------------|------|--------------------|--------------------|------|--------------------------------|-------------------|------|
|                                                     | Exposed (n=165) | Unexposed (n=3,373) | SMD  | Exposed (n=116)    | Unexposed (n=2180) | SMD  | Exposed (n=120)                | Unexposed (n=122) | SMD  |
| Age, median (IQR)                                   | 73 (61-80)      | 66 (50-78)          | 0.43 | 81 (69-87)         | 71 (57-80)         | 0.45 | 74 (61-82)                     | 74 (63-81)        | 0.03 |
| Male, N (%)                                         | 87 (52.7)       | 1,823 (54.0)        | 0.03 | 57 (49.6)          | 1,162 (53.3)       | 0.07 | 63 (52.5)                      | 63 (51.5)         | 0.02 |
| <b>Number of admissions and outpatient contacts</b> | <b>N (%)</b>    | <b>N (%)</b>        |      | <b>N (%)</b>       | <b>N (%)</b>       |      | <b>N (%)</b>                   | <b>N (%)</b>      |      |
| 0                                                   | (n<5)           | 814 (24.1)          | 0.70 | 17 (14.9)          | 84 (3.8)           | 0.39 | (n<5)                          | 1 (0.6)           | 0.10 |
| 1-2                                                 | 5 (3.0)         | 935 (27.7)          | 0.73 | 21 (18.3)          | 508 (23.3)         | 0.12 | 5 (4.2)                        | 8 (6.8)           | 0.12 |
| 3-5                                                 | 30 (18.2)       | 646 (19.2)          | 0.02 | 31 (26.9)          | 605 (27.7)         | 0.02 | 29 (24.2)                      | 20 (16.7)         | 0.19 |
| 6+                                                  | 127 (77.0)      | 978 (29.0)          | 1.10 | 46 (39.9)          | 983 (45.1)         | 0.11 | 84 (70.0)                      | 92 (75.9)         | 0.13 |
| <b>Diagnoses</b>                                    | <b>N (%)</b>    | <b>N (%)</b>        |      | <b>N (%)</b>       | <b>N (%)</b>       |      | <b>N (%)</b>                   | <b>N (%)</b>      |      |
| Cardiovascular disease                              | 97 (58.8)       | 1,337 (39.6)        | 0.39 | 76 (65.4)          | 1,041 (47.8)       | 0.36 | 68 (56.7)                      | 68 (56.0)         | 0.01 |
| Neoplasms, blood and blood-forming organs           | 11 (6.7)        | 23 (0.7)            | 0.32 | 1 (0.6)            | 18 (0.8)           | 0.03 | (n<5)                          | (n<5)             | 0.06 |
| Solid organ transplantation                         | 16 (9.7)        | 9 (0.3)             | 0.44 | 0 (0.3)            | (n<5)              | 0.03 | (n<5)                          | 1 (0.7)           | 0.09 |
| Pulmonary disease                                   | 69 (41.8)       | 537 (15.9)          | 0.60 | 22 (19.2)          | 514 (23.6)         | 0.11 | 47 (39.2)                      | 52 (43.0)         | 0.08 |
| Liver disease                                       | 9 (5.5)         | 83 (2.5)            | 0.15 | (n<5)              | 68 (3.1)           | 0.06 | 5 (4.2)                        | (n<5)             | 0.04 |
| Kidney disease                                      | 43 (26.1)       | 336 (10.0)          | 0.43 | 14 (11.8)          | 297 (13.6)         | 0.05 | 26 (21.7)                      | 24 (19.9)         | 0.04 |
| Diseases of the gastrointestinal tract              | 22 (13.3)       | 64 (1.9)            | 0.44 | (n<5)              | 57 (2.6)           | 0.07 | 8 (6.7)                        | 8 (6.4)           | 0.01 |
| Gastrointestinal pathologies                        | 37 (22.4)       | 430 (12.7)          | 0.26 | 16 (13.7)          | 353 (16.2)         | 0.07 | 23 (19.2)                      | 27 (22.4)         | 0.08 |
| Neurological and musculoskeletal disease            | 106 (64.2)      | 1,305 (38.7)        | 0.53 | 61 (52.5)          | 1,074 (49.3)       | 0.06 | 73 (60.8)                      | 77 (63.0)         | 0.05 |
| Skin disease                                        | 27 (16.4)       | 202 (6.0)           | 0.33 | 13 (10.9)          | 179 (8.2)          | 0.09 | 18 (15.0)                      | 16 (13.4)         | 0.05 |
| <b>Medications</b>                                  | <b>N (%)</b>    | <b>N (%)</b>        |      | <b>N (%)</b>       | <b>N (%)</b>       |      | <b>N (%)</b>                   | <b>N (%)</b>      |      |
| Antianaemic drugs                                   | 74 (44.8)       | 657 (19.5)          | 0.56 | 31 (26.7)          | 590 (27.1)         | 0.01 | 45 (37.5)                      | 49 (40.0)         | 0.05 |
| Cardiovascular drugs                                | 141 (85.5)      | 2,463 (73.0)        | 0.31 | 88 (76.2)          | 1,729 (79.3)       | 0.08 | 100 (83.3)                     | 103 (84.2)        | 0.02 |
| Antimicrobials                                      | 160 (97.0)      | 3,201 (94.9)        | 0.10 | 114 (98.3)         | 2,087 (95.7)       | 0.15 | 115 (95.8)                     | 118 (96.6)        | 0.04 |
| Anticoagulants                                      | 26 (15.8)       | 274 (8.1)           | 0.24 | 8 (6.6)            | 224 (10.3)         | 0.13 | 16 (13.3)                      | 16 (13.5)         | 0.00 |
| Diabetes                                            | 26 (15.8)       | 636 (18.9)          | 0.08 | 17 (14.9)          | 428 (19.6)         | 0.13 | 19 (15.8)                      | 21 (16.9)         | 0.03 |
| Obstructive airway disease                          | 95 (57.6)       | 1,162 (34.5)        | 0.48 | 44 (37.7)          | 940 (43.1)         | 0.11 | 67 (55.8)                      | 72 (59.1)         | 0.07 |
| <b>Proxies for IMID severity</b>                    | <b>N (%)</b>    | <b>N (%)</b>        |      | <b>N (%)</b>       | <b>N (%)</b>       |      | <b>N (%)</b>                   | <b>N (%)</b>      |      |
| Procedures on the skin, GI tract or joints          | 64 (38.8)       | 508 (15.1)          | 0.56 | 19 (16.8)          | 478 (21.9)         | 0.13 | 38 (31.7)                      | 40 (32.5)         | 0.02 |
| Immune-mediated inflammatory disease drugs          | 64 (38.8)       | 1,057 (31.3)        | 0.16 | 38 (32.5)          | 788 (36.1)         | 0.08 | 47 (39.2)                      | 50 (41.1)         | 0.04 |

Abbreviations: IMID; immune mediated inflammatory diseases.

**Appendix Table A19. Characteristics of SARS-CoV-2 PCR test positive patients in Denmark 26 February–20 April 2020, by exposure to immunosuppressants with inverse probability of treatment weighting (IPTW) and matching weights propensity score models.**

| Characteristics                                     | Unadjusted      |                    |      | Adjusted with IPTW |                    |      | Adjusted with matching weights |                   |      |
|-----------------------------------------------------|-----------------|--------------------|------|--------------------|--------------------|------|--------------------------------|-------------------|------|
|                                                     | Exposed (n=199) | Unexposed (n=7794) | SMD  | Exposed (n=106)    | Unexposed (n=6258) | SMD  | Exposed (n=136)                | Unexposed (n=134) | SMD  |
| Age, median (IQR)                                   | 63 (50-79)      | 50 (35-63)         | 0.61 | 65 (53-84)         | 53 (39-66)         | 0.67 | 67 (51-79)                     | 63 (50-77)        | 0.04 |
| Male, N (%)                                         | 95 (47.7)       | 3,321 (42.6)       | 0.10 | 39 (36.9)          | 2,931 (46.8)       | 0.20 | 61 (44.9)                      | 61 (45.8)         | 0.02 |
| <b>Number of admissions and outpatient contacts</b> | <b>N (%)</b>    | <b>N (%)</b>       |      | <b>N (%)</b>       | <b>N (%)</b>       |      | <b>N (%)</b>                   | <b>N (%)</b>      |      |
| 0                                                   | 9 (4.5)         | 3,122 (40.1)       | 0.94 | 17 (15.9)          | 1,671 (26.7)       | 0.27 | 7 (5.1)                        | (n<5)             | 0.09 |
| 1-2                                                 | 11 (5.5)        | 2,317 (29.7)       | 0.67 | 24 (23.0)          | 2,257 (36.1)       | 0.29 | 10 (7.4)                       | 17 (13.0)         | 0.19 |
| 3-5                                                 | 37 (18.6)       | 1,202 (15.4)       | 0.08 | 35 (32.6)          | 1,198 (19.1)       | 0.31 | 33 (24.3)                      | 31 (23.0)         | 0.03 |
| 6+                                                  | 142 (71.4)      | 1,153 (14.8)       | 1.39 | 30 (28.5)          | 1,132 (18.1)       | 0.25 | 86 (63.2)                      | 81 (60.7)         | 0.05 |
| <b>Diagnoses</b>                                    | <b>N (%)</b>    | <b>N (%)</b>       |      | <b>N (%)</b>       | <b>N (%)</b>       |      | <b>N (%)</b>                   | <b>N (%)</b>      |      |
| Cardiovascular disease                              | 77 (38.7)       | 1,534 (19.7)       | 0.43 | 51 (48.5)          | 1,367 (21.8)       | 0.58 | 52 (38.2)                      | 51 (38.1)         | 0.00 |
| Neoplasms, blood and blood-forming organs           | 14 (7.0)        | 34 (0.4)           | 0.35 | 0 (0.3)            | 31 (0.5)           | 0.03 | (n<5)                          | (n<5)             | 0.09 |
| Solid organ transplantation                         | 10 (5.0)        | 8 (0.1)            | 0.32 | 0 (0.1)            | (n<5)              | 0.01 | 1 (0.7)                        | 1 (0.6)           | 0.01 |
| Pulmonary disease                                   | 61 (30.7)       | 723 (9.3)          | 0.55 | 28 (26.1)          | 702 (11.2)         | 0.39 | 36 (26.5)                      | 36 (27.0)         | 0.01 |
| Liver disease                                       | 5 (2.5)         | 108 (1.4)          | 0.08 | 1 (0.5)            | 95 (1.5)           | 0.10 | (n<5)                          | (n<5)             | 0.04 |
| Kidney disease                                      | 31 (15.6)       | 363 (4.7)          | 0.37 | 13 (12.3)          | 320 (5.1)          | 0.26 | 16 (11.8)                      | 16 (12.3)         | 0.02 |
| Diseases of the gastrointestinal tract              | 28 (14.1)       | 112 (1.4)          | 0.49 | (n<5)              | 100 (1.6)          | 0.12 | 10 (7.4)                       | 8 (6.3)           | 0.04 |
| Gastrointestinal pathologies                        | 42 (21.1)       | 566 (7.3)          | 0.40 | 10 (9.0)           | 523 (8.4)          | 0.02 | 23 (16.9)                      | 22 (16.3)         | 0.02 |
| Neurological and musculoskeletal disease            | 143 (71.9)      | 2,380 (30.5)       | 0.91 | 45 (42.9)          | 2,335 (37.3)       | 0.11 | 92 (67.6)                      | 87 (65.3)         | 0.05 |
| Skin disease                                        | 33 (16.6)       | 378 (4.8)          | 0.39 | 5 (4.9)            | 352 (5.6)          | 0.03 | 17 (12.5)                      | 17 (12.6)         | 0.00 |
| <b>Medications</b>                                  | <b>N (%)</b>    | <b>N (%)</b>       |      | <b>N (%)</b>       | <b>N (%)</b>       |      | <b>N (%)</b>                   | <b>N (%)</b>      |      |
| Antianaemic drugs                                   | 109 (54.8)      | 871 (11.2)         | 1.05 | 30 (28.0)          | 843 (13.5)         | 0.37 | 62 (45.6)                      | 56 (41.9)         | 0.07 |
| Cardiovascular drugs                                | 150 (75.4)      | 4,317 (55.4)       | 0.43 | 79 (74.7)          | 3,585 (57.3)       | 0.37 | 102 (75.0)                     | 100 (74.8)        | 0.01 |
| Antimicrobials                                      | 196 (98.5)      | 7,339 (94.2)       | 0.23 | 104 (98.1)         | 5,975 (95.5)       | 0.15 | 133 (97.8)                     | 131 (97.8)        | 0.00 |
| Anticoagulants                                      | 17 (8.5)        | 265 (3.4)          | 0.22 | (n<5)              | 245 (3.9)          | 0.00 | 12 (8.8)                       | 12 (8.6)          | 0.01 |
| Diabetes                                            | 27 (13.6)       | 720 (9.2)          | 0.14 | 23 (21.5)          | 616 (9.8)          | 0.32 | 16 (11.8)                      | 22 (16.2)         | 0.13 |
| Obstructive airway disease                          | 90 (45.2)       | 2,189 (28.1)       | 0.36 | 50 (47.2)          | 1,839 (29.4)       | 0.37 | 57 (41.9)                      | 58 (43.4)         | 0.03 |
| <b>Proxies for IMID severity</b>                    | <b>N (%)</b>    | <b>N (%)</b>       |      | <b>N (%)</b>       | <b>N (%)</b>       |      | <b>N (%)</b>                   | <b>N (%)</b>      |      |
| Procedures on the skin, GI tract or joints          | 61 (30.7)       | 724 (9.3)          | 0.55 | 16 (15.4)          | 712 (11.4)         | 0.12 | 35 (25.7)                      | 35 (26.0)         | 0.01 |
| Immune-mediated inflammatory disease drugs          | 84 (42.2)       | 2,110 (27.1)       | 0.32 | 39 (36.6)          | 1,875 (30.0)       | 0.14 | 55 (40.4)                      | 58 (43.3)         | 0.06 |

Abbreviations: IMID; immune mediated inflammatory diseases.

**Appendix Table A20. Characteristics of SARS-CoV-2 PCR test positive patients in Denmark 20 April-18 October 2020, by exposure to immunosuppressants, with inverse probability of treatment weighting (IPTW) and matching weights propensity score models.**

| Characteristics                                     | Unadjusted      |                      |      | Adjusted with IPTW |                      |      | Adjusted with matching weights |                   |      |
|-----------------------------------------------------|-----------------|----------------------|------|--------------------|----------------------|------|--------------------------------|-------------------|------|
|                                                     | Exposed (n=328) | Unexposed (n=28,406) | SMD  | Exposed (n=146)    | Unexposed (n=18,300) | SMD  | Exposed (n=183)                | Unexposed (n=178) | SMD  |
| Age, median (IQR)                                   | 54 (36-69)      | 34 (21-52)           | 0.78 | 70 (42-79)         | 43 (26-56)           | 0.92 | 54 (37-73)                     | 52 (35-66)        | 0.14 |
| Male, N (%)                                         | 161 (49.1)      | 14,223 (50.1)        | 0.02 | 54 (36.7)          | 9,624 (52.6)         | 0.32 | 82 (44.8)                      | 80 (44.8)         | 0.00 |
| <b>Number of admissions and outpatient contacts</b> | <b>N (%)</b>    | <b>N (%)</b>         |      | <b>N (%)</b>       | <b>N (%)</b>         |      | <b>N (%)</b>                   | <b>N (%)</b>      |      |
| 0                                                   | 11 (3.4)        | 15,665 (55.1)        | 1.38 | 51 (35.0)          | 5,838 (31.9)         | 0.07 | 8 (4.4)                        | 9 (5.1)           | 0.03 |
| 1-2                                                 | 27 (8.2)        | 7,257 (25.5)         | 0.48 | 39 (26.6)          | 7,178 (39.2)         | 0.27 | 26 (14.2)                      | 29 (16.2)         | 0.05 |
| 3-5                                                 | 76 (23.2)       | 3,062 (10.8)         | 0.33 | 31 (21.0)          | 3,040 (16.6)         | 0.11 | 65 (35.5)                      | 48 (26.9)         | 0.19 |
| 6+                                                  | 214 (65.2)      | 2,422 (8.5)          | 1.45 | 26 (17.5)          | 2,245 (12.3)         | 0.15 | 84 (45.9)                      | 93 (51.8)         | 0.12 |
| <b>Diagnoses</b>                                    | <b>N (%)</b>    | <b>N (%)</b>         |      | <b>N (%)</b>       | <b>N (%)</b>         |      | <b>N (%)</b>                   | <b>N (%)</b>      |      |
| Cardiovascular disease                              | 99 (30.2)       | 2,735 (9.6)          | 0.53 | 37 (25.1)          | 2,239 (12.2)         | 0.33 | 59 (32.2)                      | 43 (24.2)         | 0.18 |
| Neoplasms, blood and blood-forming organs           | 13 (4.0)        | 67 (0.2)             | 0.26 | 0 (0.2)            | 55 (0.3)             | 0.01 | (n<5)                          | (n<5)             | 0.04 |
| Solid organ transplantation                         | 14 (4.3)        | 19 (0.1)             | 0.29 | 1 (0.4)            | (n<5)                | 0.08 | (n<5)                          | 0 (0.1)           | 0.20 |
| Pulmonary disease                                   | 70 (21.3)       | 2,019 (7.1)          | 0.42 | 11 (7.5)           | 1,634 (8.9)          | 0.05 | 33 (18.0)                      | 29 (16.4)         | 0.04 |
| Liver disease                                       | 10 (3.0)        | 194 (0.7)            | 0.18 | (n<5)              | 161 (0.9)            | 0.15 | 7 (3.8)                        | (n<5)             | 0.12 |
| Kidney disease                                      | 45 (13.7)       | 686 (2.4)            | 0.42 | 9 (6.2)            | 553 (3.0)            | 0.15 | 22 (12.0)                      | 14 (7.9)          | 0.14 |
| Diseases of the gastrointestinal tract              | 63 (19.2)       | 253 (0.9)            | 0.64 | (n<5)              | 188 (1.0)            | 0.02 | 10 (5.5)                       | 8 (4.7)           | 0.04 |
| Gastrointestinal pathologies                        | 52 (15.9)       | 1,368 (4.8)          | 0.37 | 6 (4.2)            | 1,076 (5.9)          | 0.08 | 21 (11.5)                      | 20 (10.9)         | 0.02 |
| Neurological and musculoskeletal disease            | 210 (64.0)      | 5,721 (20.1)         | 0.99 | 50 (34.5)          | 5,492 (30.0)         | 0.10 | 109 (59.6)                     | 97 (54.2)         | 0.11 |
| Skin disease                                        | 79 (24.1)       | 1,021 (3.6)          | 0.62 | 12 (8.1)           | 927 (5.1)            | 0.12 | 31 (16.9)                      | 21 (11.5)         | 0.16 |
| <b>Medications</b>                                  | <b>N (%)</b>    | <b>N (%)</b>         |      | <b>N (%)</b>       | <b>N (%)</b>         |      | <b>N (%)</b>                   | <b>N (%)</b>      |      |
| Antianaemic drugs                                   | 167 (50.9)      | 2,075 (7.3)          | 1.09 | 27 (18.1)          | 1,896 (10.4)         | 0.22 | 69 (37.7)                      | 56 (31.5)         | 0.13 |
| Cardiovascular drugs                                | 220 (67.1)      | 9,827 (34.6)         | 0.69 | 115 (78.7)         | 7,567 (41.4)         | 0.83 | 121 (66.1)                     | 111 (62.1)        | 0.08 |
| Antimicrobials                                      | 319 (97.3)      | 24,862 (87.5)        | 0.37 | 140 (95.9)         | 16,353 (89.4)        | 0.25 | 175 (95.6)                     | 171 (96.1)        | 0.02 |
| Anticoagulants                                      | 22 (6.7)        | 368 (1.3)            | 0.28 | (n<5)              | 303 (1.7)            | 0.05 | 9 (4.9)                        | 8 (4.5)           | 0.02 |
| Diabetes                                            | 38 (11.6)       | 1,491 (5.2)          | 0.23 | 13 (8.7)           | 1,183 (6.5)          | 0.08 | 21 (11.5)                      | 19 (10.9)         | 0.02 |
| Obstructive airway disease                          | 122 (37.2)      | 7,313 (25.7)         | 0.25 | 69 (47.0)          | 4,710 (25.7)         | 0.45 | 71 (38.8)                      | 60 (33.4)         | 0.11 |
| <b>Proxies for IMID severity</b>                    | <b>N (%)</b>    | <b>N (%)</b>         |      | <b>N (%)</b>       | <b>N (%)</b>         |      | <b>N (%)</b>                   | <b>N (%)</b>      |      |
| Procedures on the skin, GI tract or joints          | 101 (30.8)      | 1,515 (5.3)          | 0.70 | 10 (6.6)           | 1,421 (7.8)          | 0.05 | 33 (18.0)                      | 37 (21.0)         | 0.07 |
| Immune-mediated inflammatory disease drugs          | 168 (51.2)      | 5,541 (19.5)         | 0.70 | 61 (41.4)          | 4,914 (26.9)         | 0.31 | 80 (43.7)                      | 79 (44.1)         | 0.01 |

Abbreviations: IMID; immune mediated inflammatory diseases.

**Appendix Table A21. Variables for subgroups' propensity scores models.**

| <b>Subgroup</b>                                                                                                                      | <b>Propensity score variables</b>                                                                                                                                                                                                                                                                                                                                                                                                                                                                                                                                                                     |
|--------------------------------------------------------------------------------------------------------------------------------------|-------------------------------------------------------------------------------------------------------------------------------------------------------------------------------------------------------------------------------------------------------------------------------------------------------------------------------------------------------------------------------------------------------------------------------------------------------------------------------------------------------------------------------------------------------------------------------------------------------|
| Selective immunosuppressants (ATC group L04AA), TNF inhibitors (L04AB), and interleukin inhibitors (L04AC), and rituximab (L01XC02). | Date of birth<br>Sex<br>Date of SARS-COV-2 testing<br>Hospital admission and outpatient contacts<br>Neoplasms, blood and blood forming organs<br>Neurological and musculoskeletal disease<br>Solid organ transplant<br>Pulmonary disease<br>Diseases of the gastrointestinal tract<br>Skin disease<br>Cardiovascular disease<br>Medications for IMID                                                                                                                                                                                                                                                  |
| Calcineurin inhibitors (L04AD), other immunosuppressants (L04AX), hydroxychloroquine and chloroquine (P01BA01 and P01BA02).          | Date of birth<br>Sex<br>Date of SARS-COV-2 testing<br>Hospital admission and outpatient contacts<br>Neoplasms, blood and blood forming organs<br>Neurological and musculoskeletal disease<br>Solid organ transplant<br>Pulmonary disease<br>Diseases of the gastrointestinal tract<br>Skin disease<br>Cardiovascular disease<br>Medications for IMID<br>Procedures on the skin, GI tract, or joints<br>Gastrointestinal pathologies<br>Liver disease<br>Kidney disease                                                                                                                                |
| Systemic glucocorticoids (H02AB).                                                                                                    | Date of birth<br>Sex<br>Date of SARS-COV-2 testing<br>Hospital admission and outpatient contacts<br>Neoplasms, blood and blood forming organs<br>Neurological and musculoskeletal disease<br>Solid organ transplant<br>Pulmonary disease<br>Diseases of the gastrointestinal tract<br>Skin disease<br>Cardiovascular disease<br>Medications for IMID<br>Procedures on the skin, GI tract, or joints<br>Gastrointestinal pathologies<br>Liver disease<br>Kidney disease<br>Cardiovascular drugs<br>Antimicrobials<br>Anticoagulants<br>Drugs used in diabetes<br>Drugs for obstructive airway diseases |

Abbreviations: ATC; anatomical therapeutic chemicals, GI: gastrointestinal, IMID: immune-mediated inflammatory diseases.



## Appendix Methods

### INTRODUCTION

During the first months of the pandemic people in defined risk groups, such as patients receiving immunosuppressants, as well as elderly people and people with chronic diseases, who were expected to be more susceptible to a severe course of COVID-19 disease than the general population, were prioritised for testing. From 21 April 2020, testing was open to a wider population, however, it cannot be ruled out that persons in risk groups could be more inclined towards being tested. Therefore, we expected that patients exposed to immunosuppressants were overrepresented in our cohort. However, as virtually all individuals infected with SARS-CoV-2 who required hospital admission and a large part of those who died were tested, this overrepresentation only occurs to a small degree among individuals with the outcomes. This oversampling decreases the proportion of the exposed who have the outcome, compared to a random sample of individuals infected with SARS-CoV-2. This selection bias lowers risk estimates, but the influence will be attenuated as other persons in the risk groups, as well as health care workers, were also tested more than the general population.

### RESULTS

We show below that the bias depends on known numbers from our dataset as well as the risk ratio of being tested, for the composite exposure of persons in the risk groups and health care workers compared to others, among those infected with SARS-CoV-2 and not requiring immediate hospital admission. Appendix Figure 2 shows bias corrected estimates for the main results comparing immunosuppressant exposed patients to unexposed patients, with this risk ratio ranging from 1 to 3.

### PROOF

The argument uses the assumption that all persons with the outcomes among those with SARS-CoV-2 are tested. We will consider hospital admission first, and use the notation in Table S1 for the data in the sampled population (SARS-CoV-2 infected with a positive test) and the population of interest (SARS-CoV-2 infected).

**Appendix Table S1. Notation for the numbers of individuals with or without the outcome hospital admission, by risk group and exposure status, for individuals tested and individuals infected with SARS-CoV-2.**

|   |        | SARS-CoV-2 infected |     |     |     |
|---|--------|---------------------|-----|-----|-----|
|   |        | Tested              |     | All |     |
| I | R      | Y=0                 | Y=1 | Y=0 | Y=1 |
| 0 | 0      | A                   | C   | a.A | C   |
| 0 | 1      | B                   |     | b.B |     |
| 1 | 0 or 1 | D                   | E   | b.D | E   |

*I: immunosuppressant medications; R: risk groups and health care workers; Y: hospital admission. A-E: cell numbers; a and b: one over the probability of being tested in the respective cell.*

As hospital admission is relatively rare for the total group of SARS-CoV-2 infected, we can approximate the risk ratio of Y (hospital admission) given I (exposure to immunosuppressants) with the odds ratio:

$$RR_{Y|I} \approx OR_{Y|I} = \frac{E}{C} \times \frac{aA + bB}{bD}$$

Among those that have been tested (T):

$$RR_{Y|I,T=1} = \frac{E}{C} \times \frac{A + B + C}{D + E}$$

which gives

$$\begin{aligned} RR_{Y|I} &= RR_{Y|I,T=1} \times \frac{D+E}{A+B+C} \times \frac{aA+bB}{bD} \\ &= RR_{Y|I,T=1} \frac{D+E}{A+B+C} \times \frac{\frac{a}{b}A+B}{D} \end{aligned}$$

Note that

$$\frac{a}{b} = \frac{1}{\frac{b}{a}} = RR_{T|R,Y=0}$$

which is the risk ratio of being tested for risk groups and health care workers compared to others, restricted to those without hospital admission. The risk of testing given no hospital admission possibly later in time is hard to interpret, so we will make an approximation. As around 80% of the hospital admissions happen on the same day as testing, we will make an approximation by changing the restriction from those without hospital admission to those without hospital admission on the day of the test (S):

$$RR_{T|R,Y=0} \approx RR_{T|R,S=0}$$

Thus, we have the following equation for the risk ratio (RR) of hospital admission (Y) given exposure (I) among those who have been tested (T=1):

$$RR_{Y|I} \approx RR_{Y|I,T=1} \times \frac{D+E}{A+B+C} \times \frac{A \times RR_{T,(S=0)|R} + B}{D}$$

Where  $A$  is unexposed people, not in risk groups, without the outcome;  $B$  is unexposed people, in risk groups, without the outcome;  $C$  is unexposed people with the outcome;  $D$  exposed people without the outcome; and  $E$  is exposed people with the outcome.

To apply the equation to our data we split the matching weights dataset for hospital admission, with 89 events among 208 exposed, and 77 events among 201 exposed (as per Appendix Table 15) into risk and non-risk groups based on rough definitions and to produce the values in Table S2 (corresponding to Appendix Table S1).

**Appendix Table S2. The numbers of individuals with or without the outcome hospital admission, by risk group and exposure status, for individuals tested and individuals infected with SARS-CoV-2.**

|   |        | SARS-CoV-2 infected |     |         |     |
|---|--------|---------------------|-----|---------|-----|
|   |        | Tested              |     | All     |     |
| I | R      | Y=0                 | Y=1 | Y=0     | Y=1 |
| 0 | 0      | 115                 | 87  | a x 115 | 87  |
| 0 | 1      | 137                 |     | b x 137 |     |
| 1 | 0 or 1 | 246                 | 100 | b x 246 | 100 |

*I: immunosuppressant medications; R: risk groups and health care workers; Y: hospital admission; a and b: one over the probability of being tested in the respective cell.*

The values in Appendix Table S2 therefore give the following equation:

$$RR_{Y|I} \approx RR_{Y|I,T=1} \times \frac{346}{339} \times \frac{115 \times RR_{T|R,S=0} + 137}{246}$$

For intensive care unit (ICU) admission and death, we can again use the premise that hospital admission is relatively rare so  $\frac{aA+bB}{aD}$  will not change much by adding any number of unexposed to the numerator, or exposed with admission to hospital to the denominator. Thus, as  $\frac{D+E}{A+B+C}$  only depends on the total number of exposed and unexposed, the bias for ICU admission and death can be approximated by that for hospital admission. N.B, this bias analysis applies the main relative risk estimate with the composite exposure.

**Appendix Figure A2. Relative risk of severe outcomes of SARS-CoV-2 in patients exposed to immunosuppressants compared to unexposed patients, corrected for selection bias (the risk ratio of being tested, for risk groups and health care workers compared to the general population, ranging from 1 to 3).**

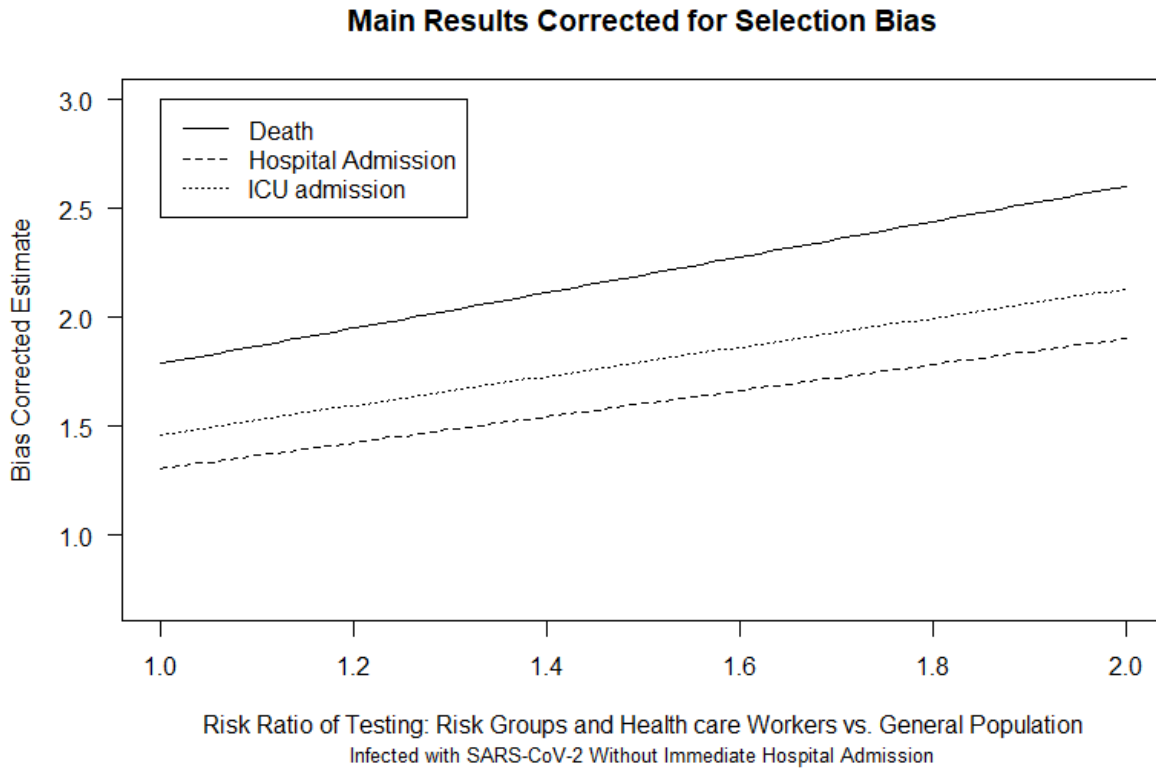

Abbreviations: ICU; Intensive care unit.
